# Supplementary material for: Prediction of potential drug targets based on simple sequence properties
Source: PubMed Central journal article supplement (PMC2082046; doi:10.1186/1471-2105-8-353), 2007-09-20
Supplement: 1471-2105-8-353-S1.pdf [file 1471-2105-8-353-S1.pdf]

**Table S1. A total of 1,383 predicted drug targets from putative non drug-target dataset**

| No. | Swiss-Prot AC | Distance | Protein Name                                                                 |
|-----|---------------|----------|------------------------------------------------------------------------------|
| 1   | Q9NPG1        | 2.4258   | Frizzled-3                                                                   |
| 2   | Q96PD7        | 2.3836   | Diacylglycerol O-acyltransferase 2                                           |
| 3   | O75084        | 2.3010   | Frizzled-7                                                                   |
| 4   | Q99835        | 2.2005   | Smoothened homolog                                                           |
| 5   | Q3MIR4        | 2.1848   | Cell cycle control protein 50B                                               |
| 6   | Q14332        | 2.1263   | Frizzled-2                                                                   |
| 7   | Q9HBY0        | 2.0400   | NADPH oxidase 3                                                              |
| 8   | Q5HYA8        | 2.0372   | Meckelin                                                                     |
| 9   | Q9NYG2        | 2.0207   | Palmitoyltransferase ZDHHC3                                                  |
| 10  | Q96MH6        | 1.9998   | Transmembrane protein 68                                                     |
| 11  | Q9UL01        | 1.9747   | Dermatan-sulfate epimerase                                                   |
| 12  | Q5SY80        | 1.9144   | Uncharacterized protein C1orf101                                             |
| 13  | Q9BQ90        | 1.8275   | Kelch domain-containing protein 3                                            |
| 14  | P20618        | 1.8185   | Proteasome subunit beta type 1                                               |
| 15  | Q8IZU2        | 1.8101   | WD repeat protein 17                                                         |
| 16  | Q9ULV1        | 1.7965   | Frizzled-4                                                                   |
| 17  | P54803        | 1.7904   | Galactocerebrosidase                                                         |
| 18  | Q9NV96        | 1.7773   | Cell cycle control protein 50A                                               |
| 19  | P51674        | 1.7762   | Neuronal membrane glycoprotein M6-a                                          |
| 20  | P35503        | 1.7696   | UDP-glucuronosyltransferase 1-3                                              |
| 21  | Q99571        | 1.7440   | P2X purinoceptor 4                                                           |
| 22  | P53396        | 1.7350   | ATP-citrate synthase                                                         |
| 23  | P08237        | 1.7246   | 6-phosphofructokinase, muscle type                                           |
| 24  | O00144        | 1.7221   | Frizzled-9                                                                   |
| 25  | O95498        | 1.7210   | Vascular non-inflammatory molecule 2                                         |
| 26  | P09848        | 1.7182   | Lactase-phlorizin hydrolase                                                  |
| 27  | Q05BV3        | 1.7095   | Echinoderm microtubule-associated protein-like 5                             |
| 28  | Q96QE2        | 1.7084   | Proton myo-inositol cotransporter                                            |
| 29  | Q9NPF4        | 1.7079   | Probable O-sialoglycoprotein endopeptidase                                   |
| 30  | Q9UJ83        | 1.7045   | 2-hydroxyacyl-CoA lyase 1                                                    |
| 31  | Q9H2Y9        | 1.6982   | Solute carrier organic anion transporter family member 5A1                   |
| 32  | Q9BV94        | 1.6864   | ER degradation-enhancing alpha-mannosidase-like 2                            |
| 33  | P46977        | 1.6756   | Dolichyl-diphosphooligosaccharide--protein glycosyltransferase subunit STT3A |
| 34  | Q99523        | 1.6645   | Sortilin                                                                     |
| 35  | Q9UBM7        | 1.6615   | 7-dehydrocholesterol reductase                                               |
| 36  | Q53GD3        | 1.6603   | Choline transporter-like protein 4                                           |
| 37  | P17858        | 1.6557   | 6-phosphofructokinase, liver type                                            |
| 38  | P48651        | 1.6383   | Phosphatidylserine synthase 1                                                |

| No. | Swiss-Prot AC | Distance | Protein Name                                                             |
|-----|---------------|----------|--------------------------------------------------------------------------|
| 39  | O14494        | 1.6343   | Lipid phosphate phosphohydrolase 1                                       |
| 40  | P31040        | 1.6283   | Succinate dehydrogenase [ubiquinone] flavoprotein subunit, mitochondrial |
| 41  | Q16348        | 1.6081   | Oligopeptide transporter, kidney isoform                                 |
| 42  | P61163        | 1.5989   | Alpha-centractin                                                         |
| 43  | Q12794        | 1.5958   | Hyaluronidase-1                                                          |
| 44  | Q86UL3        | 1.5880   | 1-acyl-sn-glycerol-3-phosphate acyltransferase zeta                      |
| 45  | P28072        | 1.5829   | Proteasome subunit beta type 6                                           |
| 46  | Q8IZU8        | 1.5797   | Dermatan-sulfate epimerase-like protein                                  |
| 47  | Q9UEF7        | 1.5699   | Klotho                                                                   |
| 48  | Q9Y519        | 1.5674   | Putative MAP kinase-activating protein C22orf5                           |
| 49  | O95497        | 1.5589   | Pantetheinase                                                            |
| 50  | P28070        | 1.5583   | Proteasome subunit beta type 4                                           |
| 51  | P33121        | 1.5578   | Long-chain-fatty-acid--CoA ligase 1                                      |
| 52  | Q8N1V2        | 1.5504   | WD repeat protein 16                                                     |
| 53  | P35504        | 1.5477   | UDP-glucuronosyltransferase 1-5                                          |
| 54  | Q9H7T0        | 1.5349   | Uncharacterized protein C14orf161                                        |
| 55  | P42025        | 1.5327   | Beta-centractin                                                          |
| 56  | Q86Z14        | 1.5133   | Beta klotho                                                              |
| 57  | P26951        | 1.5126   | Interleukin-3 receptor alpha chain                                       |
| 58  | Q14264        | 1.5090   | HERV-R_7q21.2 provirus ancestral Env polyprotein                         |
| 59  | Q6E213        | 1.5049   | Acyl-CoA wax alcohol acyltransferase 2                                   |
| 60  | Q01813        | 1.4999   | 6-phosphofructokinase type C                                             |
| 61  | Q9NY84        | 1.4987   | Vascular non-inflammatory molecule 3                                     |
| 62  | O94923        | 1.4799   | D-glucuronyl C5-epimerase                                                |
| 63  | Q9P1W3        | 1.4673   | Transmembrane protein 63C                                                |
| 64  | O60656        | 1.4641   | UDP-glucuronosyltransferase 1-9                                          |
| 65  | P68133        | 1.4630   | Actin, alpha skeletal muscle                                             |
| 66  | Q9HCC0        | 1.4622   | Methylcrotonoyl-CoA carboxylase beta chain, mitochondrial                |
| 67  | Q9NUN5        | 1.4600   | LMBR1 domain-containing protein 1                                        |
| 68  | P19224        | 1.4574   | UDP-glucuronosyltransferase 1-6                                          |
| 69  | Q96S06        | 1.4567   | Transmembrane protein 112                                                |
| 70  | Q9BZW5        | 1.4387   | Transmembrane 6 superfamily member 1                                     |
| 71  | P23378        | 1.4355   | Glycine dehydrogenase [decarboxylating], mitochondrial                   |
| 72  | Q8NDN9        | 1.4279   | RCC1 and BTB domain-containing protein 1                                 |
| 73  | P68032        | 1.4232   | Actin, alpha cardiac muscle 1                                            |
| 74  | P56373        | 1.4173   | P2X purinoceptor 3                                                       |
| 75  | Q9HCG7        | 1.4124   | Non-lysosomal glucosylceramidase                                         |
| 76  | P63267        | 1.4095   | Actin, gamma-enteric smooth muscle                                       |
| 77  | P11168        | 1.4055   | Solute carrier family 2, facilitated glucose transporter member 2        |
| 78  | Q8WUJ3        | 1.4037   | Protein KIAA1199                                                         |
| 79  | Q9NR16        | 1.3906   | Scavenger receptor cysteine-rich type 1 protein M160                     |
| 80  | Q15269        | 1.3882   | Periodic tryptophan protein 2 homolog                                    |
| 81  | Q13467        | 1.3860   | Frizzled-5                                                               |

| No. | Swiss-Prot AC | Distance | Protein Name                                                |
|-----|---------------|----------|-------------------------------------------------------------|
| 82  | Q15124        | 1.3765   | Phosphoglucomutase-like protein 5                           |
| 83  | Q6ICH7        | 1.3658   | Aspartate beta-hydroxylase domain-containing protein 2      |
| 84  | Q8NDV1        | 1.3555   | Alpha-N-acetylgalactosaminide alpha-2,6-sialyltransferase 3 |
| 85  | O95199        | 1.3511   | RCC1 and BTB domain-containing protein 2                    |
| 86  | Q6UWM7        | 1.3508   | Lactase-like protein                                        |
| 87  | Q13510        | 1.3500   | Acid ceramidase                                             |
| 88  | Q9H3G5        | 1.3415   | Probable serine carboxypeptidase CPVL                       |
| 89  | P62736        | 1.3412   | Actin, aortic smooth muscle                                 |
| 90  | P51575        | 1.3402   | P2X purinoceptor 1                                          |
| 91  | P35573        | 1.3400   | Glycogen debranching enzyme                                 |
| 92  | P40879        | 1.3327   | Chloride anion exchanger                                    |
| 93  | Q92508        | 1.3313   | Protein FAM38A                                              |
| 94  | Q9Y4X1        | 1.3282   | UDP-glucuronosyltransferase 2A1                             |
| 95  | Q9NRY7        | 1.3282   | Phospholipid scramblase 2                                   |
| 96  | Q10981        | 1.3256   | Galactoside 2-alpha-L-fucosyltransferase 2                  |
| 97  | P43251        | 1.3222   | Biotinidase                                                 |
| 98  | P22310        | 1.3183   | UDP-glucuronosyltransferase 1-4                             |
| 99  | P31512        | 1.3071   | Dimethylaniline monooxygenase [N-oxide-forming] 4           |
| 100 | Q9UKL4        | 1.3069   | Gap junction alpha-9 protein                                |
| 101 | P04839        | 1.2978   | Cytochrome b-245 heavy chain                                |
| 102 | Q9HAW9        | 1.2905   | UDP-glucuronosyltransferase 1-8                             |
| 103 | P54840        | 1.2875   | Glycogen [starch] synthase, liver                           |
| 104 | Q96H96        | 1.2851   | Para-hydroxybenzoate--polyprenyltransferase, mitochondrial  |
| 105 | Q12908        | 1.2842   | Ileal sodium/bile acid cotransporter                        |
| 106 | O60353        | 1.2807   | Frizzled-6                                                  |
| 107 | P49326        | 1.2779   | Dimethylaniline monooxygenase [N-oxide-forming] 5           |
| 108 | Q9HAW7        | 1.2747   | UDP-glucuronosyltransferase 1-7                             |
| 109 | Q9BZ23        | 1.2739   | Pantothenate kinase 2, mitochondrial                        |
| 110 | Q9UKU0        | 1.2736   | Long-chain-fatty-acid--CoA ligase 6                         |
| 111 | P53621        | 1.2680   | Coatomer subunit alpha                                      |
| 112 | P13866        | 1.2657   | Sodium/glucose cotransporter 1                              |
| 113 | Q9P0L9        | 1.2649   | Polycystic kidney disease 2-like 1 protein                  |
| 114 | Q9NS93        | 1.2629   | Transmembrane 7 superfamily member 3                        |
| 115 | Q9ULC5        | 1.2595   | Long-chain-fatty-acid--CoA ligase 5                         |
| 116 | O75841        | 1.2562   | Uroplakin-1b                                                |
| 117 | Q9HAW8        | 1.2506   | UDP-glucuronosyltransferase 1-10                            |
| 118 | Q96PL2        | 1.2487   | Beta-tectorin                                               |
| 119 | Q8IUH2        | 1.2390   | Protein CREG2                                               |
| 120 | Q96PD6        | 1.2371   | 2-acylglycerol O-acyltransferase 1                          |
| 121 | Q9NUB1        | 1.2340   | Acetyl-coenzyme A synthetase 2-like, mitochondrial          |
| 122 | P60709        | 1.2286   | Actin, cytoplasmic 1                                        |
| 123 | Q969U6        | 1.2283   | F-box/WD repeat protein 5                                   |
| 124 | Q9Y4P1        | 1.2246   | Cysteine protease ATG4B                                     |

| No. | Swiss-Prot AC | Distance | Protein Name                                                                 |
|-----|---------------|----------|------------------------------------------------------------------------------|
| 125 | Q9UP38        | 1.2180   | Frizzled-1                                                                   |
| 126 | Q9ULW8        | 1.2162   | Protein-arginine deiminase type-3                                            |
| 127 | Q86UP9        | 1.2148   | Lipoma HMGIC fusion partner-like 3 protein                                   |
| 128 | Q8N4S9        | 1.2107   | MARVEL domain-containing protein 2                                           |
| 129 | Q7Z304        | 1.2083   | MAM domain-containing protein 2                                              |
| 130 | Q9NPC4        | 1.2082   | Lactosylceramide 4-alpha-galactosyltransferase                               |
| 131 | P46059        | 1.2028   | Oligopeptide transporter, small intestine isoform                            |
| 132 | P08236        | 1.1988   | Beta-glucuronidase                                                           |
| 133 | Q8NHU2        | 1.1956   | Uncharacterized protein C20orf26                                             |
| 134 | Q8N653        | 1.1898   | Leucine-zipper-like transcriptional regulator 1                              |
| 135 | O14975        | 1.1892   | Very-long-chain acyl-CoA synthetase                                          |
| 136 | Q6ZRH7        | 1.1865   | Uncharacterized protein C19orf15                                             |
| 137 | Q11203        | 1.1845   | CMP-N-acetylneuraminate-beta-1,4-galactoside alpha-2,3- sialyltransferase    |
| 138 | Q99487        | 1.1833   | Platelet-activating factor acetylhydrolase 2, cytoplasmic                    |
| 139 | Q9NRK6        | 1.1804   | ATP-binding cassette sub-family B member 10, mitochondrial                   |
| 140 | Q504Q3        | 1.1783   | PAB-dependent poly(A)-specific ribonuclease subunit 2                        |
| 141 | Q96G23        | 1.1781   | LAG1 longevity assurance homolog 2                                           |
| 142 | Q8TCJ2        | 1.1780   | Dolichyl-diphosphooligosaccharide--protein glycosyltransferase subunit STT3B |
| 143 | P35080        | 1.1728   | Profilin-2                                                                   |
| 144 | Q14108        | 1.1668   | Lysosome membrane protein 2                                                  |
| 145 | O43520        | 1.1614   | Probable phospholipid-transporting ATPase IC                                 |
| 146 | Q93099        | 1.1578   | Homogentisate 1,2-dioxygenase                                                |
| 147 | O60423        | 1.1545   | Probable phospholipid-transporting ATPase IK                                 |
| 148 | Q9BYC2        | 1.1514   | Succinyl-CoA:3-ketoacid-coenzyme A transferase 2, mitochondrial              |
| 149 | Q9H227        | 1.1505   | Cytosolic beta-glucosidase                                                   |
| 150 | Q92604        | 1.1505   | Acyl-CoA:lysophosphatidylglycerol acyltransferase 1                          |
| 151 | Q8N8Q8        | 1.1503   | Inner membrane protein COX18, mitochondrial                                  |
| 152 | Q9NXL6        | 1.1477   | SID1 transmembrane family member 1                                           |
| 153 | Q8IWA5        | 1.1474   | Choline transporter-like protein 2                                           |
| 154 | Q9ULW2        | 1.1351   | Frizzled-10                                                                  |
| 155 | Q16518        | 1.1324   | Retinal pigment epithelium-specific 65 kDa protein                           |
| 156 | Q9NZC3        | 1.1322   | Glycerophosphodiester phosphodiesterase 1                                    |
| 157 | O00462        | 1.1272   | Beta-mannosidase                                                             |
| 158 | Q9NY91        | 1.1271   | Low affinity sodium-glucose cotransporter                                    |
| 159 | P20933        | 1.1271   | N(4)-(beta-N-acetylglucosaminyl)-L-asparaginase                              |
| 160 | Q6ZWT7        | 1.1247   | Membrane-bound O-acyltransferase domain-containing protein 2                 |
| 161 | Q9Y5S8        | 1.1215   | NADPH oxidase homolog 1                                                      |
| 162 | Q9HA77        | 1.1205   | Probable cysteinyl-tRNA synthetase, mitochondrial                            |
| 163 | Q8IU99        | 1.1193   | Protein FAM26C                                                               |
| 164 | P40126        | 1.1190   | L-dopachrome tautomerase                                                     |
| 165 | P63261        | 1.1189   | Actin, cytoplasmic 2                                                         |
| 166 | Q8NEZ3        | 1.1171   | WD repeat protein 19                                                         |
| 167 | Q8NBJ9        | 1.1134   | SID1 transmembrane family member 2                                           |

| No. | Swiss-Prot AC | Distance | Protein Name                                                       |
|-----|---------------|----------|--------------------------------------------------------------------|
| 168 | P05108        | 1.1121   | Cytochrome P450 11A1, mitochondrial                                |
| 169 | Q3SYC2        | 1.1120   | 2-acylglycerol O-acyltransferase 2                                 |
| 170 | Q96KN2        | 1.1076   | Beta-Ala-His dipeptidase                                           |
| 171 | P16930        | 1.1035   | Fumarylacetoacetase                                                |
| 172 | Q8TDB8        | 1.1025   | Solute carrier family 2, facilitated glucose transporter member 14 |
| 173 | P13807        | 1.0975   | Glycogen [starch] synthase, muscle                                 |
| 174 | Q96GX1        | 1.0973   | Tectonic-2                                                         |
| 175 | Q15436        | 1.0884   | Protein transport protein Sec23A                                   |
| 176 | Q9Y4E6        | 1.0841   | WD repeat protein 7                                                |
| 177 | P29144        | 1.0770   | Tripeptidyl-peptidase 2                                            |
| 178 | Q02083        | 1.0756   | N-acylethanolamine-hydrolyzing acid amidase                        |
| 179 | Q9HAY6        | 1.0726   | Beta,beta-carotene 15,15'-monooxygenase                            |
| 180 | P53794        | 1.0718   | Sodium/myo-inositol cotransporter                                  |
| 181 | Q9NWZ5        | 1.0713   | Uridine/cytidine kinase-like 1                                     |
| 182 | Q9H1J5        | 1.0712   | Protein Wnt-8a                                                     |
| 183 | Q8WVQ1        | 1.0634   | Soluble calcium-activated nucleotidase 1                           |
| 184 | Q5GH73        | 1.0632   | XK-related protein 6                                               |
| 185 | Q9UQF0        | 1.0625   | HERV-W_7q21.2 provirus ancestral Env polyprotein                   |
| 186 | Q96DB2        | 1.0588   | Histone deacetylase 11                                             |
| 187 | Q10570        | 1.0565   | Cleavage and polyadenylation specificity factor subunit 1          |
| 188 | P06756        | 1.0554   | Integrin alpha-V                                                   |
| 189 | Q9UKT5        | 1.0528   | F-box only protein 4                                               |
| 190 | Q8N7A1        | 1.0506   | Kelch domain-containing protein 1                                  |
| 191 | Q92611        | 1.0490   | ER degradation-enhancing alpha-mannosidase-like 1                  |
| 192 | Q9Y2J8        | 1.0483   | Protein-arginine deiminase type-2                                  |
| 193 | Q9NYB5        | 1.0461   | Solute carrier organic anion transporter family member 1C1         |
| 194 | P01031        | 1.0440   | Complement C5                                                      |
| 195 | Q01344        | 1.0383   | Interleukin-5 receptor alpha chain                                 |
| 196 | Q5GLZ8        | 1.0380   | Probable E3 ubiquitin-protein ligase HERC4                         |
| 197 | Q8TDG2        | 1.0365   | Actin-related protein T1                                           |
| 198 | O60502        | 1.0352   | Bifunctional protein NCOAT                                         |
| 199 | Q9H0V1        | 1.0325   | Transmembrane protein 168                                          |
| 200 | Q96DT6        | 1.0313   | Cysteine protease ATG4C                                            |
| 201 | P61566        | 1.0297   | HERV-K_22q11.21 provirus ancestral Env polyprotein                 |
| 202 | Q9H9Y6        | 1.0274   | DNA-directed RNA polymerase I subunit RPA2                         |
| 203 | Q96MB7        | 1.0268   | Uncharacterized protein C11orf77                                   |
| 204 | Q5T3F8        | 1.0268   | Transmembrane protein 63B                                          |
| 205 | Q9NR71        | 1.0225   | Neutral ceramidase                                                 |
| 206 | Q5TEA3        | 1.0224   | Uncharacterized protein C20orf194                                  |
| 207 | P54802        | 1.0122   | Alpha-N-acetylglucosaminidase                                      |
| 208 | P55809        | 1.0105   | Succinyl-CoA:3-ketoacid-coenzyme A transferase 1, mitochondrial    |
| 209 | Q5HY92        | 1.0091   | Fidgetin                                                           |
| 210 | Q6IA86        | 1.0065   | Elongator complex protein 2                                        |

| No. | Swiss-Prot AC | Distance | Protein Name                                                          |
|-----|---------------|----------|-----------------------------------------------------------------------|
| 211 | Q9Y4K0        | 1.0052   | Lysyl oxidase homolog 2                                               |
| 212 | Q15070        | 1.0025   | Inner membrane protein OXA1L, mitochondrial                           |
| 213 | Q9NXK6        | 1.0023   | Membrane progesterin receptor gamma                                   |
| 214 | Q6ZPD8        | 1.0005   | Diacylglycerol O-acyltransferase 2-like protein 6                     |
| 215 | P15509        | 0.9999   | Granulocyte-macrophage colony-stimulating factor receptor alpha chain |
| 216 | P17948        | 0.9996   | Vascular endothelial growth factor receptor 1                         |
| 217 | Q9HCJ1        | 0.9990   | Progressive ankylosis protein homolog                                 |
| 218 | Q8WU66        | 0.9983   | Protein TSPEAR                                                        |
| 219 | Q86VF5        | 0.9962   | 2-acylglycerol O-acyltransferase 3                                    |
| 220 | Q9UPU3        | 0.9959   | VPS10 domain-containing receptor SorCS3                               |
| 221 | O94955        | 0.9949   | Rho-related BTB domain-containing protein 3                           |
| 222 | Q9H3D4        | 0.9935   | Tumor protein p73-like                                                |
| 223 | O60637        | 0.9874   | Tetraspanin-3                                                         |
| 224 | Q9HC07        | 0.9850   | Transmembrane protein 165                                             |
| 225 | Q14117        | 0.9849   | Dihydropyrimidinase                                                   |
| 226 | Q9P2H3        | 0.9826   | Intraflagellar transport 80 homolog                                   |
| 227 | Q8N5B7        | 0.9821   | LAG1 longevity assurance homolog 5                                    |
| 228 | P61158        | 0.9815   | Actin-like protein 3                                                  |
| 229 | Q0VDG4        | 0.9790   | Secernin-3                                                            |
| 230 | Q8TCT9        | 0.9778   | Minor histocompatibility antigen H13                                  |
| 231 | Q92959        | 0.9771   | Solute carrier organic anion transporter family member 2A1            |
| 232 | P49768        | 0.9737   | Presenilin-1                                                          |
| 233 | Q7Z3F1        | 0.9717   | Integral membrane protein GPR155                                      |
| 234 | Q01740        | 0.9671   | Dimethylaniline monooxygenase [N-oxide-forming] 1                     |
| 235 | Q8NFT2        | 0.9627   | Metalloreductase STEAP2                                               |
| 236 | Q96EY1        | 0.9622   | DnaJ homolog subfamily A member 3, mitochondrial                      |
| 237 | Q99572        | 0.9611   | P2X purinoceptor 7                                                    |
| 238 | Q9NRZ5        | 0.9603   | 1-acyl-sn-glycerol-3-phosphate acyltransferase delta                  |
| 239 | Q9HAC7        | 0.9590   | Uncharacterized protein C7orf10                                       |
| 240 | Q13093        | 0.9565   | Platelet-activating factor acetylhydrolase                            |
| 241 | P23470        | 0.9540   | Receptor-type tyrosine-protein phosphatase gamma                      |
| 242 | Q9H553        | 0.9508   | Alpha-1,3-mannosyltransferase ALG2                                    |
| 243 | Q16880        | 0.9494   | 2-hydroxyacylsphingosine 1-beta-galactosyltransferase                 |
| 244 | Q5GH72        | 0.9470   | XK-related protein 7                                                  |
| 245 | Q9NQT6        | 0.9423   | Fascin-3                                                              |
| 246 | Q8NDY3        | 0.9418   | [Protein ADP-ribosylarginine] hydrolase-like protein 1                |
| 247 | P61568        | 0.9408   | HERV-K_1p13.3 provirus ancestral Env polyprotein                      |
| 248 | Q86Y01        | 0.9401   | Protein deltex-1                                                      |
| 249 | Q8NFX6        | 0.9369   | Vomeroneasal type-1 receptor 2                                        |
| 250 | O00767        | 0.9362   | Acyl-CoA desaturase                                                   |
| 251 | Q9NZ32        | 0.9354   | Actin-related protein 10                                              |
| 252 | O60774        | 0.9326   | Putative dimethylaniline monooxygenase [N-oxide-forming] 6            |
| 253 | Q9Y236        | 0.9306   | Oxidative stress induced growth inhibitor 2                           |

| No. | Swiss-Prot AC | Distance | Protein Name                                                        |
|-----|---------------|----------|---------------------------------------------------------------------|
| 254 | Q9H300        | 0.9289   | Presenilins-associated rhomboid-like protein, mitochondrial         |
| 255 | Q06430        | 0.9273   | N-acetyllactosaminide beta-1,6-N-acetylglucosaminyl-transferase     |
| 256 | Q9H0B8        | 0.9270   | Cysteine-rich secretory protein LCCL domain-containing 2            |
| 257 | Q12907        | 0.9218   | Vesicular integral-membrane protein VIP36                           |
| 258 | Q9BYD9        | 0.9216   | Actin-related protein M1                                            |
| 259 | P51993        | 0.9211   | Alpha-(1,3)-fucosyltransferase                                      |
| 260 | Q9H1C4        | 0.9199   | UNC93 homolog B1                                                    |
| 261 | Q96Q42        | 0.9194   | Alsin                                                               |
| 262 | O94886        | 0.9190   | Transmembrane protein 63A                                           |
| 263 | Q15437        | 0.9164   | Protein transport protein Sec23B                                    |
| 264 | Q70EL3        | 0.9160   | Inactive ubiquitin carboxyl-terminal hydrolase 50                   |
| 265 | Q9NPL8        | 0.9146   | Uncharacterized protein C3orf1                                      |
| 266 | O94901        | 0.9134   | Sad1/unc-84 protein-like 1                                          |
| 267 | Q8WW27        | 0.9120   | Putative C-                                                         |
| 268 | O15033        | 0.9112   | Protein KIAA0317                                                    |
| 269 | Q8NCS7        | 0.9093   | Choline transporter-like protein 5                                  |
| 270 | Q5TDP6        | 0.9091   | Glutamate--ammonia ligase domain-containing protein 1               |
| 271 | Q9NRM6        | 0.9076   | Interleukin-17 receptor B                                           |
| 272 | Q96N76        | 0.9032   | Probable urocanate hydratase                                        |
| 273 | Q96QG7        | 0.9024   | Myotubularin-related protein 9                                      |
| 274 | Q5JPE7        | 0.9016   | Nodal modulator 2                                                   |
| 275 | P15104        | 0.9011   | Glutamine synthetase                                                |
| 276 | P04180        | 0.9011   | Phosphatidylcholine-sterol acyltransferase                          |
| 277 | Q9P2L0        | 0.8992   | WD repeat protein 35                                                |
| 278 | P61567        | 0.8909   | HERV-K_1q22 provirus ancestral Env polyprotein                      |
| 279 | Q15034        | 0.8908   | Probable E3 ubiquitin-protein ligase HERC3                          |
| 280 | Q9NRF8        | 0.8846   | CTP synthase 2                                                      |
| 281 | Q9NR34        | 0.8831   | Mannosyl-oligosaccharide 1,2-alpha-mannosidase IC                   |
| 282 | Q9NZI5        | 0.8813   | Grainyhead-like protein 1 homolog                                   |
| 283 | O75694        | 0.8808   | Nuclear pore complex protein Nup155                                 |
| 284 | Q5TGI0        | 0.8790   | Uncharacterized protein C6orf168                                    |
| 285 | Q86TX2        | 0.8774   | Acyl-coenzyme A thioesterase 1                                      |
| 286 | P58215        | 0.8712   | Lysyl oxidase homolog 3                                             |
| 287 | Q9Y315        | 0.8711   | Putative deoxyribose-phosphate aldolase                             |
| 288 | Q9HAT2        | 0.8710   | Sialate O-acetyltransferase                                         |
| 289 | P31513        | 0.8692   | Dimethylaniline monooxygenase [N-oxide-forming] 3                   |
| 290 | Q16549        | 0.8688   | Proprotein convertase subtilisin/kexin type 7                       |
| 291 | P10267        | 0.8685   | HERV-K_5q33.3 provirus ancestral Env polyprotein                    |
| 292 | Q8TF62        | 0.8627   | Probable phospholipid-transporting ATPase IM                        |
| 293 | Q8WTR4        | 0.8617   | Glycerophosphodiester phosphodiesterase domain-containing protein 5 |
| 294 | P11498        | 0.8607   | Pyruvate carboxylase, mitochondrial                                 |
| 295 | Q8NDH3        | 0.8584   | Probable aminopeptidase NPEPL1                                      |
| 296 | O96005        | 0.8570   | Cleft lip and palate transmembrane protein 1                        |

| No. | Swiss-Prot AC | Distance | Protein Name                                                                  |
|-----|---------------|----------|-------------------------------------------------------------------------------|
| 297 | Q9NRZ7        | 0.8561   | 1-acyl-sn-glycerol-3-phosphate acyltransferase gamma                          |
| 298 | P22309        | 0.8541   | UDP-glucuronosyltransferase 1-1                                               |
| 299 | Q9BWM7        | 0.8492   | Sideroflexin-3                                                                |
| 300 | Q8TED0        | 0.8465   | U3 small nucleolar RNA-associated protein 15 homolog                          |
| 301 | P16671        | 0.8459   | Platelet glycoprotein 4                                                       |
| 302 | Q8TE04        | 0.8452   | Pantothenate kinase 1                                                         |
| 303 | P22760        | 0.8408   | Arylacetamide deacetylase                                                     |
| 304 | Q9Y276        | 0.8402   | Mitochondrial chaperone BCS1                                                  |
| 305 | O75356        | 0.8400   | Ectonucleoside triphosphate diphosphohydrolase 5                              |
| 306 | Q9GZN1        | 0.8391   | Actin-related protein 6                                                       |
| 307 | Q8NDZ0        | 0.8375   | Uncharacterized protein CXorf20                                               |
| 308 | Q5T197        | 0.8363   | DC-STAMP domain-containing protein 1                                          |
| 309 | Q9UMX1        | 0.8345   | Suppressor of fused homolog                                                   |
| 310 | Q93052        | 0.8344   | Lipoma-preferred partner                                                      |
| 311 | Q9Y4W6        | 0.8334   | AFG3-like protein 2                                                           |
| 312 | Q00403        | 0.8330   | Transcription initiation factor IIB                                           |
| 313 | Q9BUB7        | 0.8308   | Transmembrane protein 70                                                      |
| 314 | Q8TAF8        | 0.8287   | Lipoma HMGIC fusion partner-like 5 protein                                    |
| 315 | P39656        | 0.8270   | Dolichyl-diphosphooligosaccharide--protein glycosyltransferase 48 kDa subunit |
| 316 | Q8N4N3        | 0.8255   | Kelch repeat and BTB domain-containing protein C16orf44                       |
| 317 | Q9NPH5        | 0.8235   | NADPH oxidase 4                                                               |
| 318 | P14672        | 0.8223   | Solute carrier family 2, facilitated glucose transporter member 4             |
| 319 | Q969W1        | 0.8220   | Probable palmitoyltransferase ZDHHC16                                         |
| 320 | P30876        | 0.8203   | DNA-directed RNA polymerase II 140 kDa polypeptide                            |
| 321 | P19526        | 0.8192   | Galactoside 2-alpha-L-fucosyltransferase 1                                    |
| 322 | Q8N3J5        | 0.8188   | Protein phosphatase 1K, mitochondrial                                         |
| 323 | Q96NU7        | 0.8168   | Probable imidazolonepropionase                                                |
| 324 | Q6P1M0        | 0.8159   | Long-chain fatty acid transport protein 4                                     |
| 325 | P69849        | 0.8156   | Nodal modulator 3                                                             |
| 326 | Q99538        | 0.8147   | Legumain                                                                      |
| 327 | P30520        | 0.8143   | Adenylosuccinate synthetase isozyme 2                                         |
| 328 | Q9HB40        | 0.8129   | Retinoid-inducible serine carboxypeptidase                                    |
| 329 | Q6IA69        | 0.8118   | Glutamine-dependent NAD(+) synthetase                                         |
| 330 | Q96SE0        | 0.8116   | Abhydrolase domain-containing protein 1                                       |
| 331 | Q01581        | 0.8108   | Hydroxymethylglutaryl-CoA synthase, cytoplasmic                               |
| 332 | P18074        | 0.8096   | TFIIH basal transcription factor complex helicase subunit                     |
| 333 | Q8NCC3        | 0.8077   | 1-O-acylceramide synthase                                                     |
| 334 | O95436        | 0.8067   | Sodium-dependent phosphate transport protein 2B                               |
| 335 | Q92995        | 0.8053   | Ubiquitin carboxyl-terminal hydrolase 13                                      |
| 336 | P31146        | 0.8053   | Coronin-1A                                                                    |
| 337 | Q8NB12        | 0.8039   | SET and MYND domain-containing protein 1                                      |
| 338 | Q9HCJ5        | 0.8020   | Zinc finger SWIM domain-containing protein 6 (Fragment)                       |
| 339 | P12277        | 0.8011   | Creatine kinase B-type                                                        |



| No. | Swiss-Prot AC | Distance | Protein Name                                                  |
|-----|---------------|----------|---------------------------------------------------------------|
| 340 | Q03154        | 0.8001   | Aminoacylase-1                                                |
| 341 | Q9NRQ2        | 0.7985   | Phospholipid scramblase 4                                     |
| 342 | Q15155        | 0.7985   | Nodal modulator 1                                             |
| 343 | Q9UMR5        | 0.7983   | Lysosomal thioesterase PPT2                                   |
| 344 | Q5GH76        | 0.7977   | XK-related protein 4                                          |
| 345 | Q9BY64        | 0.7961   | UDP-glucuronosyltransferase 2B28                              |
| 346 | Q9BZB8        | 0.7960   | Cytoplasmic polyadenylation element-binding protein 1         |
| 347 | P48506        | 0.7933   | Glutamate--cysteine ligase catalytic subunit                  |
| 348 | O14986        | 0.7929   | Phosphatidylinositol-4-phosphate 5-kinase type-1 beta         |
| 349 | O14925        | 0.7901   | Mitochondrial import inner membrane translocase subunit Tim23 |
| 350 | Q5VUY2        | 0.7889   | Arylacetamide deacetylase-like 4                              |
| 351 | Q8NFZ0        | 0.7888   | F-box only protein 18                                         |
| 352 | P14679        | 0.7875   | Tyrosinase                                                    |
| 353 | Q9HDB8        | 0.7866   | HERV-K_3q12.3 provirus ancestral Env polyprotein              |
| 354 | O75355        | 0.7864   | Ectonucleoside triphosphate diphosphohydrolase 3              |
| 355 | Q9HD40        | 0.7863   | O-phosphoserine-tRNA(Sec) selenium transferase                |
| 356 | P27544        | 0.7862   | LAG1 longevity assurance homolog 1                            |
| 357 | O43556        | 0.7862   | Epsilon-sarcoglycan                                           |
| 358 | P13726        | 0.7859   | Tissue factor                                                 |
| 359 | Q9H5I5        | 0.7858   | Protein FAM38B                                                |
| 360 | P60509        | 0.7855   | HERV-R(b)_3p24.3 provirus ancestral Env polyprotein           |
| 361 | Q9UIB8        | 0.7809   | SLAM family member 5                                          |
| 362 | O75844        | 0.7808   | CAAX prenyl protease 1 homolog                                |
| 363 | P46597        | 0.7741   | Hydroxyindole O-methyltransferase                             |
| 364 | P29122        | 0.7739   | Proprotein convertase subtilisin/kexin type 6                 |
| 365 | Q93086        | 0.7703   | P2X purinoceptor 5                                            |
| 366 | Q9NNW5        | 0.7700   | WD repeat protein 6                                           |
| 367 | Q9Y2K9        | 0.7691   | Syntaxin-binding protein 5-like                               |
| 368 | Q9UJM8        | 0.7686   | Hydroxyacid oxidase 1                                         |
| 369 | Q15393        | 0.7682   | Splicing factor 3B subunit 3                                  |
| 370 | P78406        | 0.7654   | mRNA export factor                                            |
| 371 | Q2TBA0        | 0.7636   | Kelch repeat and BTB domain-containing protein 5              |
| 372 | O00391        | 0.7635   | Sulfhydryl oxidase 1                                          |
| 373 | P50395        | 0.7629   | Rab GDP dissociation inhibitor beta                           |
| 374 | Q13085        | 0.7623   | Acetyl-CoA carboxylase 1                                      |
| 375 | Q93100        | 0.7618   | Phosphorylase b kinase regulatory subunit beta                |
| 376 | Q9NX78        | 0.7613   | Uncharacterized protein C14orf101                             |
| 377 | Q9H7P6        | 0.7598   | Protein FAM125B                                               |
| 378 | Q53S58        | 0.7592   | Transmembrane protein 177                                     |
| 379 | P60508        | 0.7578   | HERV-FRD_6p24.1 provirus ancestral Env polyprotein            |
| 380 | Q9UI40        | 0.7564   | Sodium/potassium/calcium exchanger 2                          |
| 381 | P13639        | 0.7498   | Elongation factor 2                                           |
| 382 | Q9UJ37        | 0.7476   | Alpha-N-acetylgalactosaminide alpha-2,6-sialyltransferase 2   |

| No. | Swiss-Prot AC | Distance | Protein Name                                                    |
|-----|---------------|----------|-----------------------------------------------------------------|
| 383 | Q9BR76        | 0.7466   | Coronin-1B                                                      |
| 384 | Q9UBV4        | 0.7446   | Protein Wnt-16                                                  |
| 385 | O95954        | 0.7437   | Formimidoyltransferase-cyclodeaminase                           |
| 386 | Q9UQ90        | 0.7373   | Paraplegin                                                      |
| 387 | Q99519        | 0.7352   | Sialidase-1                                                     |
| 388 | Q6PCE3        | 0.7349   | Phosphoglucomutase-2-like 1                                     |
| 389 | Q9H568        | 0.7331   | Actin-like protein 8                                            |
| 390 | Q96BD0        | 0.7322   | Solute carrier organic anion transporter family member 4A1      |
| 391 | Q6ZV70        | 0.7303   | LanC-like protein 3                                             |
| 392 | Q9UQ49        | 0.7284   | Sialidase-3                                                     |
| 393 | Q9H3N1        | 0.7281   | Thioredoxin domain-containing protein 1                         |
| 394 | O42043        | 0.7258   | HERV-K_1q23.3 provirus ancestral Env polyprotein                |
| 395 | Q8N6M5        | 0.7247   | Probable allantoicase                                           |
| 396 | Q8TBH0        | 0.7229   | Arrestin domain-containing protein 2                            |
| 397 | Q9BTX1        | 0.7226   | Nucleoporin NDC1                                                |
| 398 | Q9BXR0        | 0.7215   | Queuine tRNA-ribosyltransferase                                 |
| 399 | O43820        | 0.7208   | Hyaluronidase-3                                                 |
| 400 | Q9BS26        | 0.7204   | Thioredoxin domain-containing protein 4                         |
| 401 | O75310        | 0.7200   | UDP-glucuronosyltransferase 2B11                                |
| 402 | P49753        | 0.7170   | Acyl-coenzyme A thioesterase 2                                  |
| 403 | Q96LU5        | 0.7167   | Mitochondrial inner membrane protease subunit 1                 |
| 404 | Q93063        | 0.7138   | Exostosin-2                                                     |
| 405 | O71037        | 0.7122   | HERV-K_19q12 provirus ancestral Env polyprotein                 |
| 406 | P60507        | 0.7111   | HERV-F(c)1_Xq21.33 provirus ancestral Env polyprotein           |
| 407 | Q7Z403        | 0.7106   | Transmembrane channel-like protein 6                            |
| 408 | O43688        | 0.7103   | Lipid phosphate phosphohydrolase 2                              |
| 409 | Q9Y2E5        | 0.7099   | Epididymis-specific alpha-mannosidase                           |
| 410 | Q86WB7        | 0.7095   | UNC93 homolog A                                                 |
| 411 | Q8N9L9        | 0.7066   | Acyl-coenzyme A thioesterase 4                                  |
| 412 | Q9Y2E6        | 0.7050   | Protein deltex-4                                                |
| 413 | Q99627        | 0.7036   | COP9 signalosome complex subunit 8                              |
| 414 | P01033        | 0.7027   | Metalloproteinase inhibitor 1                                   |
| 415 | Q8NCR0        | 0.7025   | UDP-GalNAc:beta-1,3-N-acetylgalactosaminyltransferase 2         |
| 416 | Q9NQY5        | 0.6989   | Exosome complex exonuclease RRP40                               |
| 417 | Q10713        | 0.6977   | Mitochondrial-processing peptidase alpha subunit, mitochondrial |
| 418 | O94805        | 0.6969   | Actin-like protein 6B                                           |
| 419 | Q92828        | 0.6962   | Coronin-2A                                                      |
| 420 | Q8NCG7        | 0.6946   | Sn1-specific diacylglycerol lipase beta                         |
| 421 | O75439        | 0.6946   | Mitochondrial-processing peptidase subunit beta, mitochondrial  |
| 422 | Q8IYD2        | 0.6945   | Kelch domain-containing protein 8A                              |
| 423 | Q96EY5        | 0.6919   | Protein FAM125A                                                 |
| 424 | Q8NBX0        | 0.6907   | Probable saccharopine dehydrogenase                             |
| 425 | O15230        | 0.6898   | Laminin subunit alpha-5                                         |

| No. | Swiss-Prot AC | Distance | Protein Name                                                            |
|-----|---------------|----------|-------------------------------------------------------------------------|
| 426 | Q9Y2T3        | 0.6895   | Guanine deaminase                                                       |
| 427 | O60701        | 0.6870   | UDP-glucose 6-dehydrogenase                                             |
| 428 | Q11128        | 0.6865   | Alpha-(1,3)-fucosyltransferase                                          |
| 429 | Q5JSJ4        | 0.6857   | Protein DDX26B                                                          |
| 430 | O14495        | 0.6849   | Lipid phosphate phosphohydrolase 3                                      |
| 431 | Q8NFH4        | 0.6845   | Nucleoporin Nup37                                                       |
| 432 | Q13228        | 0.6844   | Selenium-binding protein 1                                              |
| 433 | P46976        | 0.6843   | Glycogenin-1                                                            |
| 434 | Q58A45        | 0.6835   | PAB-dependent poly(A)-specific ribonuclease subunit 3                   |
| 435 | P49915        | 0.6830   | GMP synthase [glutamine-hydrolyzing]                                    |
| 436 | O75306        | 0.6817   | NADH dehydrogenase [ubiquinone] iron-sulfur protein 2, mitochondrial    |
| 437 | Q9NUQ2        | 0.6809   | 1-acyl-sn-glycerol-3-phosphate acyltransferase epsilon                  |
| 438 | Q9H9S3        | 0.6793   | Protein transport protein Sec61 subunit alpha isoform 2                 |
| 439 | P16662        | 0.6787   | UDP-glucuronosyltransferase 2B7                                         |
| 440 | Q96G03        | 0.6786   | Phosphoglucomutase-2                                                    |
| 441 | P48200        | 0.6786   | Iron-responsive element-binding protein 2                               |
| 442 | Q6P5S2        | 0.6773   | Uncharacterized protein C6orf58                                         |
| 443 | P46019        | 0.6770   | Phosphorylase b kinase regulatory subunit alpha, liver isoform          |
| 444 | P49821        | 0.6763   | NADH dehydrogenase [ubiquinone] flavoprotein 1, mitochondrial           |
| 445 | P09544        | 0.6752   | Protein Wnt-2                                                           |
| 446 | P33908        | 0.6749   | Mannosyl-oligosaccharide 1,2-alpha-mannosidase IA                       |
| 447 | P25788        | 0.6746   | Proteasome subunit alpha type 3                                         |
| 448 | Q6PCB7        | 0.6726   | Long-chain fatty acid transport protein 1                               |
| 449 | Q96S97        | 0.6725   | Myeloid-associated differentiation marker                               |
| 450 | O95158        | 0.6725   | Neurexophilin-4                                                         |
| 451 | Q5VW38        | 0.6722   | Protein GPR107                                                          |
| 452 | Q92747        | 0.6718   | Actin-related protein 2/3 complex subunit 1A                            |
| 453 | Q9Y6N1        | 0.6710   | Cytochrome c oxidase assembly protein COX11, mitochondrial              |
| 454 | P11169        | 0.6694   | Solute carrier family 2, facilitated glucose transporter member 3       |
| 455 | Q9HCN3        | 0.6683   | Transmembrane protein 8                                                 |
| 456 | O94823        | 0.6653   | Probable phospholipid-transporting ATPase VB                            |
| 457 | P58499        | 0.6652   | Protein FAM3B                                                           |
| 458 | Q9NVE7        | 0.6649   | Pantothenate kinase 4                                                   |
| 459 | P53677        | 0.6635   | AP-3 complex subunit mu-2                                               |
| 460 | Q96LB8        | 0.6626   | Peptidoglycan recognition protein I-beta                                |
| 461 | O00116        | 0.6613   | Alkyldihydroxyacetonephosphate synthase, peroxisomal                    |
| 462 | Q9UKJ8        | 0.6610   | ADAM 21                                                                 |
| 463 | A0AVT1        | 0.6603   | Ubiquitin-activating enzyme E1-like protein 2                           |
| 464 | Q9HBJ8        | 0.6580   | Collectrin                                                              |
| 465 | Q9Y471        | 0.6563   | Cytidine monophosphate-N-acetylneuraminic acid hydroxylase-like protein |
| 466 | Q969X6        | 0.6558   | Cirhin                                                                  |
| 467 | Q8NFF2        | 0.6545   | Sodium/potassium/calcium exchanger 4                                    |
| 468 | Q9H0C3        | 0.6542   | Transmembrane protein 117                                               |

| No. | Swiss-Prot AC | Distance | Protein Name                                                      |
|-----|---------------|----------|-------------------------------------------------------------------|
| 469 | Q6NUS6        | 0.6535   | Tectonic-3                                                        |
| 470 | P46721        | 0.6530   | Solute carrier organic anion transporter family member 1A2        |
| 471 | Q5T9L3        | 0.6474   | Integral membrane protein GPR177                                  |
| 472 | Q7Z3C6        | 0.6471   | Autophagy-related protein 9A                                      |
| 473 | Q15084        | 0.6466   | Protein disulfide-isomerase A6                                    |
| 474 | P37287        | 0.6446   | Phosphatidylinositol N-acetylglucosaminyltransferase subunit A    |
| 475 | Q9BTV4        | 0.6440   | Transmembrane protein 43                                          |
| 476 | O75387        | 0.6439   | Large neutral amino acids transporter small subunit 3             |
| 477 | Q96RR1        | 0.6437   | Twinkle protein, mitochondrial                                    |
| 478 | Q969X1        | 0.6435   | Transmembrane BAX inhibitor motif-containing protein 1            |
| 479 | Q9NUE0        | 0.6433   | Palmitoyltransferase ZDHHC18                                      |
| 480 | Q8N142        | 0.6431   | Adenylosuccinate synthetase isozyme 1                             |
| 481 | P01024        | 0.6420   | Complement C3                                                     |
| 482 | Q9UJ70        | 0.6408   | N-acetylglucosamine kinase                                        |
| 483 | Q5JRX3        | 0.6406   | Presequence protease, mitochondrial                               |
| 484 | Q9P241        | 0.6384   | Probable phospholipid-transporting ATPase VD                      |
| 485 | Q16658        | 0.6374   | Fascin                                                            |
| 486 | O00763        | 0.6373   | Acetyl-CoA carboxylase 2                                          |
| 487 | Q8NAT1        | 0.6370   | Uncharacterized glycosyltransferase AGO61                         |
| 488 | Q96TA2        | 0.6351   | ATP-dependent metalloprotease YME1L1                              |
| 489 | Q9NXF8        | 0.6350   | Palmitoyltransferase ZDHHC7                                       |
| 490 | Q14627        | 0.6349   | Interleukin-13 receptor alpha-2 chain                             |
| 491 | Q9H0W9        | 0.6345   | Ester hydrolase C11orf54                                          |
| 492 | Q6MZZ7        | 0.6343   | Calpain-13                                                        |
| 493 | Q16635        | 0.6316   | Tafazzin                                                          |
| 494 | Q92185        | 0.6299   | Alpha-N-acetylneuraminide alpha-2,8-sialyltransferase             |
| 495 | Q9GZS1        | 0.6297   | DNA-directed RNA polymerase I-associated factor 53 kDa subunit    |
| 496 | Q13347        | 0.6281   | Eukaryotic translation initiation factor 3 subunit 2              |
| 497 | Q9H9G7        | 0.6275   | Eukaryotic translation initiation factor 2C 3                     |
| 498 | P05166        | 0.6264   | Propionyl-CoA carboxylase beta chain, mitochondrial               |
| 499 | Q13126        | 0.6242   | S-methyl-5-thioadenosine phosphorylase                            |
| 500 | Q9UGQ3        | 0.6220   | Solute carrier family 2, facilitated glucose transporter member 6 |
| 501 | Q9ULV4        | 0.6218   | Coronin-1C                                                        |
| 502 | P32019        | 0.6209   | Type II inositol-1,4,5-trisphosphate 5-phosphatase                |
| 503 | O96019        | 0.6186   | Actin-like protein 6A                                             |
| 504 | Q9NR19        | 0.6180   | Acetyl-coenzyme A synthetase, cytoplasmic                         |
| 505 | Q86SQ6        | 0.6170   | Probable G-protein coupled receptor 123                           |
| 506 | P17540        | 0.6166   | Creatine kinase, sarcomeric mitochondrial                         |
| 507 | Q8WU17        | 0.6165   | RING finger protein 139                                           |
| 508 | Q9H4M9        | 0.6147   | EH domain-containing protein 1                                    |
| 509 | Q8NFG4        | 0.6136   | Folliculin                                                        |
| 510 | Q9Y573        | 0.6133   | Actin-binding protein IPP                                         |
| 511 | Q9NX77        | 0.6127   | HERV-K_16p3.3 provirus ancestral Env polyprotein                  |

| No. | Swiss-Prot AC | Distance | Protein Name                                                                      |
|-----|---------------|----------|-----------------------------------------------------------------------------------|
| 512 | Q15029        | 0.6125   | 116 kDa U5 small nuclear ribonucleoprotein component                              |
| 513 | Q9UKM7        | 0.6118   | Endoplasmic reticulum mannosyl-oligosaccharide 1,2-alpha-mannosidase              |
| 514 | Q6ZMG9        | 0.6110   | LAG1 longevity assurance homolog 6                                                |
| 515 | O95620        | 0.6103   | tRNA-dihydrouridine synthase 4-like                                               |
| 516 | Q53R12        | 0.6095   | Transmembrane 4 L6 family member 20                                               |
| 517 | Q86VB7        | 0.6088   | Scavenger receptor cysteine-rich type 1 protein M130                              |
| 518 | Q8IXB1        | 0.6058   | DnaJ homolog subfamily C member 10                                                |
| 519 | P11245        | 0.6054   | Arylamine N-acetyltransferase 2                                                   |
| 520 | Q9NRX5        | 0.6049   | Serine incorporator 1                                                             |
| 521 | Q8N465        | 0.6048   | D-2-hydroxyglutarate dehydrogenase, mitochondrial                                 |
| 522 | Q9NXC2        | 0.6025   | Glucose-fructose oxidoreductase domain-containing protein 1                       |
| 523 | Q8TAA9        | 0.6000   | Vang-like protein 1                                                               |
| 524 | O94956        | 0.5991   | Solute carrier organic anion transporter family member 2B1                        |
| 525 | Q8TEQ6        | 0.5987   | Gem-associated protein 5                                                          |
| 526 | Q9H4F1        | 0.5978   | Alpha-N-acetyl-neuraminyl-2,3-beta-galactosyl-1,3-N-acetyl- galactosaminide alpha |
| 527 | Q86W33        | 0.5978   | Integral membrane protein GPR175                                                  |
| 528 | Q9HC73        | 0.5977   | Cytokine receptor-like factor 2                                                   |
| 529 | Q96GX9        | 0.5977   | APAF1-interacting protein                                                         |
| 530 | O43301        | 0.5975   | Heat shock 70 kDa protein 12A                                                     |
| 531 | O75165        | 0.5973   | DnaJ homolog subfamily C member 13                                                |
| 532 | Q9BYV7        | 0.5966   | Beta,beta-carotene 9',10'-dioxygenase                                             |
| 533 | Q5VSG8        | 0.5961   | Glycoprotein endo-alpha-1,2-mannosidase-like protein                              |
| 534 | Q8N442        | 0.5956   | GTP-binding protein GUF1 homolog                                                  |
| 535 | P38567        | 0.5949   | Hyaluronidase PH-20                                                               |
| 536 | Q69384        | 0.5945   | HERV-K_7p22.1 provirus ancestral Env polyprotein                                  |
| 537 | Q7Z7L7        | 0.5929   | Zyg-11 protein homolog                                                            |
| 538 | O60678        | 0.5927   | Protein arginine N-methyltransferase 3                                            |
| 539 | Q7Z4I7        | 0.5912   | LIM and senescent cell antigen-like-containing domain protein 2                   |
| 540 | O15350        | 0.5909   | Tumor protein p73                                                                 |
| 541 | P53370        | 0.5897   | Nucleoside diphosphate-linked moiety X motif 6                                    |
| 542 | P30566        | 0.5881   | Adenylosuccinate lyase                                                            |
| 543 | P61619        | 0.5857   | Protein transport protein Sec61 subunit alpha isoform 1                           |
| 544 | O95045        | 0.5835   | Uridine phosphorylase 2                                                           |
| 545 | Q96LB9        | 0.5819   | Peptidoglycan recognition protein I-alpha                                         |
| 546 | Q04721        | 0.5819   | Neurogenic locus notch homolog protein 2                                          |
| 547 | O95859        | 0.5816   | Tetraspanin-12                                                                    |
| 548 | Q8WZA1        | 0.5785   | Protein O-linked-mannose beta-1,2-N-acetylglucosaminyltransferase 1               |
| 549 | Q92562        | 0.5776   | SAC domain-containing protein 3                                                   |
| 550 | P35606        | 0.5769   | Coatomer subunit beta'                                                            |
| 551 | Q9BYW1        | 0.5752   | Solute carrier family 2, facilitated glucose transporter member 11                |
| 552 | Q8N4M1        | 0.5751   | Choline transporter-like protein 3                                                |
| 553 | Q8IVQ6        | 0.5736   | Probable palmitoyltransferase ZDHHC21                                             |
| 554 | O00754        | 0.5730   | Lysosomal alpha-mannosidase                                                       |

| No. | Swiss-Prot AC | Distance | Protein Name                                                  |
|-----|---------------|----------|---------------------------------------------------------------|
| 555 | Q6TGC4        | 0.5717   | Protein-arginine deiminase type-6                             |
| 556 | Q9NZN4        | 0.5709   | EH domain-containing protein 2                                |
| 557 | Q8TBR7        | 0.5702   | Protein FAM57A                                                |
| 558 | P15144        | 0.5689   | Aminopeptidase N                                              |
| 559 | Q8NI60        | 0.5671   | Chaperone-activity of bc1 complex-like, mitochondrial         |
| 560 | Q5T6V5        | 0.5656   | Uncharacterized protein C9orf64                               |
| 561 | Q9P2K2        | 0.5641   | Thioredoxin domain-containing protein KIAA1344                |
| 562 | Q96RP9        | 0.5629   | Elongation factor G 1, mitochondrial                          |
| 563 | Q902F8        | 0.5626   | HERV-K_8p23.1 provirus ancestral Env polyprotein              |
| 564 | Q9NW08        | 0.5610   | DNA-directed RNA polymerase III subunit 127.6 kDa polypeptide |
| 565 | Q8N9V3        | 0.5607   | WD repeat, SAM and U-box domain-containing protein 1          |
| 566 | P23435        | 0.5602   | Cerebellin-1                                                  |
| 567 | Q9UK96        | 0.5593   | F-box only protein 10                                         |
| 568 | Q9UMX9        | 0.5585   | Membrane-associated transporter protein                       |
| 569 | Q8I WV8       | 0.5569   | E3 ubiquitin-protein ligase UBR2                              |
| 570 | Q9Y227        | 0.5567   | Ectonucleoside triphosphate diphosphohydrolase 4              |
| 571 | Q8NE79        | 0.5539   | Blood vessel epicardial substance                             |
| 572 | P63135        | 0.5532   | HERV-K_1q22 provirus ancestral Pol protein                    |
| 573 | Q5T5C0        | 0.5521   | Syntaxin-binding protein 5                                    |
| 574 | Q9NX05        | 0.5504   | UPF0318 protein FAM120C                                       |
| 575 | Q15042        | 0.5503   | Rab3 GTPase-activating protein catalytic subunit              |
| 576 | Q8NES3        | 0.5501   | Beta-1,3-N-acetylglucosaminyltransferase lunatic fringe       |
| 577 | Q6ZMY6        | 0.5442   | WD repeat protein 88                                          |
| 578 | Q96NB2        | 0.5416   | Sideroflexin-2                                                |
| 579 | O75648        | 0.5409   | tRNA                                                          |
| 580 | Q6UWF7        | 0.5406   | Protein FAM55D                                                |
| 581 | Q8NBS3        | 0.5404   | Sodium bicarbonate transporter-like protein 11                |
| 582 | Q96GQ5        | 0.5391   | UPF0420 protein C16orf58                                      |
| 583 | Q9H2C0        | 0.5388   | Gigaxonin                                                     |
| 584 | P36537        | 0.5358   | UDP-glucuronosyltransferase 2B10                              |
| 585 | P41252        | 0.5322   | Isoleucyl-tRNA synthetase, cytoplasmic                        |
| 586 | Q9Y2U9        | 0.5319   | Kelch domain-containing protein 2                             |
| 587 | Q8N122        | 0.5310   | Regulatory-associated protein of mTOR                         |
| 588 | P17812        | 0.5309   | CTP synthase 1                                                |
| 589 | P36382        | 0.5307   | Gap junction alpha-5 protein                                  |
| 590 | O14525        | 0.5306   | Astrotactin-1                                                 |
| 591 | Q9Y263        | 0.5305   | Phospholipase A-2-activating protein                          |
| 592 | Q6P4A8        | 0.5295   | LAMA-like protein 1                                           |
| 593 | Q4G0P3        | 0.5287   | Hydrocephalus-inducing protein homolog                        |
| 594 | O00442        | 0.5282   | RNA 3'-terminal phosphate cyclase                             |
| 595 | Q9BSA9        | 0.5274   | Transmembrane protein 175                                     |
| 596 | Q9NZV5        | 0.5272   | Selenoprotein N                                               |
| 597 | Q16831        | 0.5264   | Uridine phosphorylase 1                                       |

| No. | Swiss-Prot AC | Distance | Protein Name                                                      |
|-----|---------------|----------|-------------------------------------------------------------------|
| 598 | Q14118        | 0.5264   | Dystroglycan                                                      |
| 599 | P10266        | 0.5262   | HERV-K_5q33.3 provirus ancestral Pol protein                      |
| 600 | O43506        | 0.5261   | ADAM 20                                                           |
| 601 | Q902F9        | 0.5260   | HERV-K_19p13.11 provirus ancestral Env polyprotein                |
| 602 | Q9Y5V3        | 0.5252   | Melanoma-associated antigen D1                                    |
| 603 | Q9NRY6        | 0.5238   | Phospholipid scramblase 3                                         |
| 604 | Q96N67        | 0.5234   | Dedicator of cytokinesis protein 7                                |
| 605 | Q9H0C5        | 0.5224   | BTB/POZ domain-containing protein 1                               |
| 606 | Q8IYS1        | 0.5209   | Aminoacylase 1-like protein 2                                     |
| 607 | Q8NEL9        | 0.5202   | Probable phospholipase DDHD1                                      |
| 608 | Q9GZV3        | 0.5192   | High-affinity choline transporter 1                               |
| 609 | P12532        | 0.5190   | Creatine kinase, ubiquitous mitochondrial                         |
| 610 | Q9UL03        | 0.5188   | Integrator complex subunit 6                                      |
| 611 | Q969X5        | 0.5176   | Endoplasmic reticulum-Golgi intermediate compartment protein 1    |
| 612 | Q8NCQ5        | 0.5163   | F-box only protein 15                                             |
| 613 | Q14410        | 0.5159   | Glycerol kinase, testis specific 2                                |
| 614 | Q9P0J1        | 0.5145   | [Pyruvate dehydrogenase [lipoamide]]-phosphatase 1, mitochondrial |
| 615 | Q86W34        | 0.5141   | Archaemetzincin-2                                                 |
| 616 | Q9P2S5        | 0.5136   | WD repeat protein 8                                               |
| 617 | O60337        | 0.5132   | E3 ubiquitin-protein ligase MARCH6                                |
| 618 | Q9Y6L6        | 0.5122   | Solute carrier organic anion transporter family member 1B1        |
| 619 | Q16706        | 0.5104   | Alpha-mannosidase 2                                               |
| 620 | Q9UKN8        | 0.5095   | General transcription factor 3C polypeptide 4                     |
| 621 | P61565        | 0.5095   | HERV-K_12q14.1 provirus ancestral Env polyprotein                 |
| 622 | Q92874        | 0.5094   | Deoxyribonuclease I-like 2                                        |
| 623 | Q9UGI0        | 0.5080   | Zinc finger Ran-binding domain-containing protein 1               |
| 624 | Q86UB9        | 0.5079   | Transmembrane protein 135                                         |
| 625 | Q96F25        | 0.5072   | UDP-N-acetylglucosamine transferase subunit ALG14 homolog         |
| 626 | Q96FA3        | 0.5065   | Protein pellino homolog 1                                         |
| 627 | Q3T906        | 0.5040   | N-acetylglucosamine-1-phosphotransferase subunits alpha/beta      |
| 628 | Q8TDJ6        | 0.5039   | Protein DmX-like 2                                                |
| 629 | Q9BYT9        | 0.5038   | Transmembrane protein 16C                                         |
| 630 | Q6P2Q9        | 0.5036   | Pre-mRNA-processing-splicing factor 8                             |
| 631 | Q9NXS3        | 0.5030   | Kelch-like protein 28                                             |
| 632 | Q6P1X5        | 0.5023   | Transcription initiation factor TFIID subunit 2                   |
| 633 | Q9NTJ4        | 0.5014   | Alpha-mannosidase 2C1                                             |
| 634 | Q9H223        | 0.5001   | EH domain-containing protein 4                                    |
| 635 | Q8NEZ5        | 0.5000   | F-box only protein 22                                             |
| 636 | P55895        | 0.4995   | V(D)J recombination-activating protein 2                          |
| 637 | O14672        | 0.4988   | ADAM 10                                                           |
| 638 | P31639        | 0.4978   | Sodium/glucose cotransporter 2                                    |
| 639 | P07737        | 0.4976   | Profilin-1                                                        |
| 640 | Q9NYV8        | 0.4963   | Taste receptor type 2 member 14                                   |

| No. | Swiss-Prot AC | Distance | Protein Name                                                             |
|-----|---------------|----------|--------------------------------------------------------------------------|
| 641 | Q9Y5K1        | 0.4946   | Meiotic recombination protein SPO11                                      |
| 642 | Q6UX65        | 0.4939   | Transmembrane protein 77                                                 |
| 643 | Q8WUE5        | 0.4928   | Uncharacterized protein CXorf48                                          |
| 644 | Q9Y2E4        | 0.4922   | Disco-interacting protein 2 homolog C                                    |
| 645 | Q9UBU6        | 0.4917   | Protein FAM8A1                                                           |
| 646 | Q86SG7        | 0.4907   | Lysozyme g-like protein 2                                                |
| 647 | Q9NRM0        | 0.4901   | Solute carrier family 2, facilitated glucose transporter member 9        |
| 648 | Q8WWI5        | 0.4898   | Choline transporter-like protein 1                                       |
| 649 | P18440        | 0.4890   | Arylamine N-acetyltransferase 1                                          |
| 650 | Q9Y3I0        | 0.4885   | UPF0027 protein C22orf28                                                 |
| 651 | Q6P1M3        | 0.4883   | Lethal(2) giant larvae protein homolog 2                                 |
| 652 | O95704        | 0.4875   | Amyloid beta A4 protein-binding family B member 3                        |
| 653 | Q9NYQ3        | 0.4866   | Hydroxyacid oxidase 2                                                    |
| 654 | Q9NYU2        | 0.4864   | UDP-glucose:glycoprotein glucosyltransferase 1                           |
| 655 | Q96B86        | 0.4863   | Repulsive guidance molecule A                                            |
| 656 | Q6ZUI0        | 0.4845   | Protein FAM79B                                                           |
| 657 | Q9BTE6        | 0.4831   | Alanyl-tRNA synthetase domain-containing protein 1                       |
| 658 | Q8N766        | 0.4824   | Uncharacterized protein KIAA0090                                         |
| 659 | Q9H336        | 0.4818   | Cysteine-rich secretory protein LCCL domain-containing 1                 |
| 660 | Q9NRR4        | 0.4816   | Ribonuclease 3                                                           |
| 661 | Q9UHL4        | 0.4808   | Dipeptidyl-peptidase 2                                                   |
| 662 | O94953        | 0.4794   | JmjC domain-containing histone demethylation protein 3B                  |
| 663 | Q9UG56        | 0.4789   | Phosphatidylserine decarboxylase proenzyme                               |
| 664 | Q14194        | 0.4788   | Dihydropyrimidinase-related protein 1                                    |
| 665 | Q15125        | 0.4783   | 3-beta-hydroxysteroid-Delta(8),Delta(7)-isomerase                        |
| 666 | P32929        | 0.4780   | Cystathionine gamma-lyase                                                |
| 667 | Q6P4A7        | 0.4770   | Sideroflexin-4                                                           |
| 668 | P61421        | 0.4767   | Vacuolar ATP synthase subunit d 1                                        |
| 669 | Q63HN8        | 0.4763   | RING finger protein 213                                                  |
| 670 | P46020        | 0.4760   | Phosphorylase b kinase regulatory subunit alpha, skeletal muscle isoform |
| 671 | Q9H920        | 0.4755   | RING finger protein 121                                                  |
| 672 | Q9UKH3        | 0.4754   | HERV-K_6q14.1 provirus ancestral Env polyprotein                         |
| 673 | Q9NV23        | 0.4747   | S-acyl fatty acid synthase thioesterase, medium chain                    |
| 674 | Q9Y2P4        | 0.4724   | Long-chain fatty acid transport protein 6                                |
| 675 | Q99518        | 0.4722   | Dimethylaniline monooxygenase [N-oxide-forming] 2                        |
| 676 | Q92542        | 0.4705   | Nicestrin                                                                |
| 677 | P51654        | 0.4696   | Glypican-3                                                               |
| 678 | O95631        | 0.4695   | Netrin-1                                                                 |
| 679 | Q9NY64        | 0.4694   | Solute carrier family 2, facilitated glucose transporter member 8        |
| 680 | Q96RQ3        | 0.4689   | Methylcrotonoyl-CoA carboxylase subunit alpha, mitochondrial             |
| 681 | Q8IWR0        | 0.4678   | Zinc finger CCCH domain-containing protein 7A                            |
| 682 | P56703        | 0.4673   | Proto-oncogene protein Wnt-3                                             |
| 683 | Q9BZH6        | 0.4666   | Bromodomain and WD repeat domain-containing protein 2                    |



| No. | Swiss-Prot AC | Distance | Protein Name                                                      |
|-----|---------------|----------|-------------------------------------------------------------------|
| 684 | Q71RS6        | 0.4665   | Sodium/potassium/calcium exchanger 5                              |
| 685 | Q99447        | 0.4662   | Ethanolamine-phosphate cytidyltransferase                         |
| 686 | P00966        | 0.4642   | Argininosuccinate synthase                                        |
| 687 | Q6P587        | 0.4634   | Fumarylacetoacetate hydrolase domain-containing protein 1         |
| 688 | Q14849        | 0.4618   | StAR-related lipid transfer protein 3                             |
| 689 | Q63HM2        | 0.4613   | Uncharacterized protein C14orf135                                 |
| 690 | P49641        | 0.4612   | Alpha-mannosidase IIx                                             |
| 691 | Q9HBG6        | 0.4607   | Intraflagellar transport 122 homolog                              |
| 692 | Q6RW13        | 0.4591   | Type-1 angiotensin II receptor-associated protein                 |
| 693 | Q9ULX6        | 0.4581   | A-kinase anchor protein 8-like                                    |
| 694 | Q96L92        | 0.4577   | Sorting nexin-27                                                  |
| 695 | P33992        | 0.4575   | DNA replication licensing factor MCM5                             |
| 696 | O95486        | 0.4575   | Protein transport protein Sec24A (Fragment)                       |
| 697 | P04066        | 0.4562   | Tissue alpha-L-fucosidase                                         |
| 698 | Q92824        | 0.4557   | Proprotein convertase subtilisin/kexin type 5                     |
| 699 | Q969S9        | 0.4537   | Elongation factor G 2, mitochondrial                              |
| 700 | Q9H598        | 0.4505   | Vesicular inhibitory amino acid transporter                       |
| 701 | Q08380        | 0.4499   | Galectin-3-binding protein                                        |
| 702 | Q9HB63        | 0.4492   | Netrin-4                                                          |
| 703 | Q9UM07        | 0.4487   | Protein-arginine deiminase type-4                                 |
| 704 | Q9BSN7        | 0.4482   | Claudin-like protein 24                                           |
| 705 | Q8IVU3        | 0.4480   | Probable E3 ubiquitin-protein ligase HERC6                        |
| 706 | Q7Z7J7        | 0.4477   | Lipoma HMGIC fusion partner-like 4 protein                        |
| 707 | P11166        | 0.4474   | Solute carrier family 2, facilitated glucose transporter member 1 |
| 708 | O95452        | 0.4473   | Gap junction beta-6 protein                                       |
| 709 | P58743        | 0.4445   | Prestin                                                           |
| 710 | P28065        | 0.4442   | Proteasome subunit beta type 9                                    |
| 711 | Q9H1P3        | 0.4441   | Oxysterol-binding protein-related protein 2                       |
| 712 | Q96DT5        | 0.4433   | Ciliary dynein heavy chain 11                                     |
| 713 | Q8TCB0        | 0.4432   | Interferon-induced protein 44                                     |
| 714 | Q8TB22        | 0.4430   | Spermatogenesis-associated protein 20                             |
| 715 | Q96Q91        | 0.4420   | Anion exchange protein 4                                          |
| 716 | Q96NS1        | 0.4418   | Protein yippee-like 4                                             |
| 717 | Q14156        | 0.4417   | Protein EFR3-like                                                 |
| 718 | Q15654        | 0.4416   | Thyroid receptor-interacting protein 6                            |
| 719 | P49588        | 0.4403   | Alanyl-tRNA synthetase, cytoplasmic                               |
| 720 | A1L020        | 0.4386   | RNA-binding protein MEX3A                                         |
| 721 | Q8N4F7        | 0.4378   | RING finger protein 175                                           |
| 722 | Q96M94        | 0.4376   | Kelch-like protein 15                                             |
| 723 | P31150        | 0.4372   | Rab GDP dissociation inhibitor alpha                              |
| 724 | Q86UW9        | 0.4370   | Protein deltex-2                                                  |
| 725 | O95573        | 0.4363   | Long-chain-fatty-acid--CoA ligase 3                               |
| 726 | P49961        | 0.4362   | Ectonucleoside triphosphate diphosphohydrolase 1                  |

| No. | Swiss-Prot AC | Distance | Protein Name                                                       |
|-----|---------------|----------|--------------------------------------------------------------------|
| 727 | Q96KP4        | 0.4343   | Cytosolic non-specific dipeptidase                                 |
| 728 | Q8TDN7        | 0.4323   | Alkaline ceramidase 1                                              |
| 729 | P25787        | 0.4278   | Proteasome subunit alpha type 2                                    |
| 730 | Q6J4K2        | 0.4271   | Sodium/potassium/calcium exchanger 6                               |
| 731 | Q9NYC9        | 0.4245   | Ciliary dynein heavy chain 9                                       |
| 732 | O75808        | 0.4239   | Calpain-15                                                         |
| 733 | O43684        | 0.4233   | Mitotic checkpoint protein BUB3                                    |
| 734 | O75795        | 0.4232   | UDP-glucuronosyltransferase 2B17                                   |
| 735 | Q86TL0        | 0.4208   | Cysteine protease ATG4D                                            |
| 736 | Q96HP0        | 0.4207   | Dedicator of cytokinesis protein 6                                 |
| 737 | P52701        | 0.4204   | DNA mismatch repair protein MSH6                                   |
| 738 | Q16394        | 0.4201   | Exostosin-1                                                        |
| 739 | Q9NPB8        | 0.4193   | Putative glycerophosphodiester phosphodiesterase 5                 |
| 740 | Q9Y606        | 0.4191   | tRNA pseudouridine synthase A                                      |
| 741 | Q6ZSI9        | 0.4179   | Calpain-12                                                         |
| 742 | Q9NZB2        | 0.4176   | UPF0318 protein FAM120A                                            |
| 743 | O95772        | 0.4156   | MLN64 N-terminal domain homolog                                    |
| 744 | Q13496        | 0.4140   | Myotubularin                                                       |
| 745 | Q9Y316        | 0.4124   | Protein MEMO1                                                      |
| 746 | Q9NS86        | 0.4123   | LanC-like protein 2                                                |
| 747 | Q6ISB3        | 0.4120   | Grainyhead-like protein 2 homolog                                  |
| 748 | O00628        | 0.4110   | Peroxisomal targeting signal 2 receptor                            |
| 749 | Q7Z401        | 0.4109   | C-myc promoter-binding protein                                     |
| 750 | Q96HA4        | 0.4101   | Uncharacterized protein C1orf159                                   |
| 751 | Q03167        | 0.4097   | TGF-beta receptor type III                                         |
| 752 | Q9NYP3        | 0.4089   | Protein downstream neighbor of Son                                 |
| 753 | Q5W0Z9        | 0.4082   | Probable palmitoyltransferase ZDHHC20                              |
| 754 | P31153        | 0.4071   | S-adenosylmethionine synthetase isoform type-2                     |
| 755 | Q9NP59        | 0.4067   | Solute carrier family 40 member 1                                  |
| 756 | Q15035        | 0.4065   | Translocation-associated membrane protein 2                        |
| 757 | Q96S15        | 0.4064   | WD repeat protein 24                                               |
| 758 | Q96GW9        | 0.4064   | Methionyl-tRNA synthetase, mitochondrial                           |
| 759 | Q9P258        | 0.4061   | Protein RCC2                                                       |
| 760 | O75153        | 0.4042   | Putative eukaryotic translation initiation factor 3 subunit        |
| 761 | Q53H47        | 0.4028   | Histone-lysine N-methyltransferase SETMAR                          |
| 762 | P16519        | 0.4021   | Neuroendocrine convertase 2                                        |
| 763 | Q68CP4        | 0.4018   | Heparan-alpha-glucosaminide N-acetyltransferase                    |
| 764 | Q14703        | 0.3998   | Membrane-bound transcription factor site-1 protease                |
| 765 | O95528        | 0.3997   | Solute carrier family 2, facilitated glucose transporter member 10 |
| 766 | Q9H5V8        | 0.3987   | CUB domain-containing protein 1                                    |
| 767 | P10768        | 0.3973   | S-formylglutathione hydrolase                                      |
| 768 | Q9UMY4        | 0.3970   | Sorting nexin-12                                                   |
| 769 | P21399        | 0.3969   | Iron-responsive element-binding protein 1                          |

| No. | Swiss-Prot AC | Distance | Protein Name                                               |
|-----|---------------|----------|------------------------------------------------------------|
| 770 | Q8NBN3        | 0.3968   | Transmembrane protein 87A                                  |
| 771 | Q9P217        | 0.3963   | Zinc finger SWIM domain-containing protein 5               |
| 772 | Q8NFH5        | 0.3954   | Nucleoporin NUP53                                          |
| 773 | Q8N3G9        | 0.3929   | Transmembrane protein 130                                  |
| 774 | Q70JA7        | 0.3917   | Chondroitin sulfate synthase 3                             |
| 775 | P58658        | 0.3913   | Uncharacterized protein C21orf63                           |
| 776 | Q9Y312        | 0.3907   | Uncharacterized protein C20orf4                            |
| 777 | Q9H9B4        | 0.3891   | Sideroflexin-1                                             |
| 778 | Q9H7M6        | 0.3890   | Zinc finger SWIM domain-containing protein 4               |
| 779 | P40121        | 0.3886   | Macrophage-capping protein                                 |
| 780 | Q96RD6        | 0.3884   | Pannexin-2                                                 |
| 781 | Q9NPD5        | 0.3844   | Solute carrier organic anion transporter family member 1B3 |
| 782 | Q8TCE6        | 0.3842   | Protein FAM45A                                             |
| 783 | O75534        | 0.3834   | Cold shock domain-containing protein E1                    |
| 784 | Q9UQ03        | 0.3830   | Coronin-2B                                                 |
| 785 | P28749        | 0.3830   | Retinoblastoma-like protein 1                              |
| 786 | Q9Y4P8        | 0.3796   | WD repeat domain phosphoinositide-interacting protein 2    |
| 787 | Q8WVR3        | 0.3790   | Uncharacterized protein C7orf43                            |
| 788 | P36268        | 0.3784   | Gamma-glutamyltransferase-like protein 2                   |
| 789 | Q9HAT8        | 0.3770   | Protein pellino homolog 2                                  |
| 790 | Q6QEF8        | 0.3770   | Coronin-6                                                  |
| 791 | O60931        | 0.3738   | Cystinosin                                                 |
| 792 | P54855        | 0.3732   | UDP-glucuronosyltransferase 2B15                           |
| 793 | Q4KMQ2        | 0.3712   | Transmembrane protein 16F                                  |
| 794 | Q9UBV7        | 0.3706   | Beta-1,4-galactosyltransferase 7                           |
| 795 | P54098        | 0.3695   | DNA polymerase subunit gamma 1                             |
| 796 | Q9Y5Y7        | 0.3689   | Lymphatic vessel endothelial hyaluronic acid receptor 1    |
| 797 | P49842        | 0.3684   | Serine/threonine-protein kinase 19                         |
| 798 | Q86X10        | 0.3680   | Protein KIAA1219                                           |
| 799 | Q5QJU3        | 0.3673   | Alkaline ceramidase 2                                      |
| 800 | O95377        | 0.3638   | Gap junction beta-5 protein                                |
| 801 | P10619        | 0.3634   | Lysosomal protective protein                               |
| 802 | Q9NQZ7        | 0.3620   | Ectonucleoside triphosphate diphosphohydrolase 7           |
| 803 | Q8WYK0        | 0.3608   | Acyl-coenzyme A thioesterase 12                            |
| 804 | Q8WVP7        | 0.3596   | Limb region 1 protein homolog                              |
| 805 | Q9H497        | 0.3593   | Torsin-3A                                                  |
| 806 | Q6ZUX7        | 0.3588   | Lipoma HMGIC fusion partner-like 2 protein                 |
| 807 | O95373        | 0.3583   | Importin-7                                                 |
| 808 | Q9UBX8        | 0.3571   | Beta-1,4-galactosyltransferase 6                           |
| 809 | Q9NY33        | 0.3561   | Dipeptidyl-peptidase 3                                     |
| 810 | P08034        | 0.3551   | Gap junction beta-1 protein                                |
| 811 | Q70EK9        | 0.3548   | Ubiquitin carboxyl-terminal hydrolase 51                   |
| 812 | O43761        | 0.3528   | Synaptogyrin-3                                             |

| No. | Swiss-Prot AC | Distance | Protein Name                                                    |
|-----|---------------|----------|-----------------------------------------------------------------|
| 813 | Q86YT5        | 0.3522   | Solute carrier family 13 member 5                               |
| 814 | Q6NSI4        | 0.3519   | Uncharacterized protein CXorf57                                 |
| 815 | P61160        | 0.3519   | Actin-like protein 2                                            |
| 816 | Q64LD2        | 0.3500   | WD repeat protein 25                                            |
| 817 | Q96B67        | 0.3499   | Arrestin domain-containing protein 3                            |
| 818 | Q8IWA0        | 0.3495   | WD repeat protein 75                                            |
| 819 | Q8WTS6        | 0.3489   | Histone-lysine N-methyltransferase, H3 lysine-4 specific SET7   |
| 820 | Q9H488        | 0.3484   | GDP-fucose protein O-fucosyltransferase 1                       |
| 821 | Q9P253        | 0.3478   | Vacuolar protein sorting-associated protein 18 homolog          |
| 822 | P36871        | 0.3473   | Phosphoglucomutase-1                                            |
| 823 | Q9BVG9        | 0.3463   | Phosphatidylserine synthase 2                                   |
| 824 | O43909        | 0.3463   | Exostosin-like 3                                                |
| 825 | Q9Y615        | 0.3447   | Actin-like protein 7A                                           |
| 826 | Q5VUG0        | 0.3435   | Scm-like with four MBT domains protein 2                        |
| 827 | Q9UNX4        | 0.3423   | WD repeat protein 3                                             |
| 828 | Q9Y6I4        | 0.3419   | Ubiquitin carboxyl-terminal hydrolase 3                         |
| 829 | O15162        | 0.3412   | Phospholipid scramblase 1                                       |
| 830 | Q9BTW9        | 0.3408   | Tubulin-specific chaperone D                                    |
| 831 | Q9H295        | 0.3401   | Transmembrane 7 superfamily member 4                            |
| 832 | Q9Y3F4        | 0.3398   | Serine-threonine kinase receptor-associated protein             |
| 833 | Q9NZN3        | 0.3395   | EH domain-containing protein 3                                  |
| 834 | Q9NPA1        | 0.3393   | Calcium-activated potassium channel subunit beta 3              |
| 835 | Q8NFL0        | 0.3392   | UDP-GlcNAc:betaGal beta-1,3-N-acetylglucosaminyltransferase 7   |
| 836 | O60830        | 0.3388   | Mitochondrial import inner membrane translocase subunit Tim17-B |
| 837 | Q9UHI3        | 0.3384   | Scm-like with four MBT domains protein 1                        |
| 838 | Q8WXF7        | 0.3370   | Atlastin-1                                                      |
| 839 | Q8WUM9        | 0.3366   | Sodium-dependent phosphate transporter 1                        |
| 840 | Q969R5        | 0.3362   | Lethal(3)malignant brain tumor-like 2 protein                   |
| 841 | Q05996        | 0.3361   | Zona pellucida sperm-binding protein 2                          |
| 842 | Q92935        | 0.3359   | Exostosin-like 1                                                |
| 843 | Q14202        | 0.3346   | Zinc finger MYM-type protein 3                                  |
| 844 | Q9Y296        | 0.3345   | Trafficking protein particle complex subunit 4                  |
| 845 | Q9UIA9        | 0.3337   | Exportin-7                                                      |
| 846 | Q5JST6        | 0.3337   | EF-hand domain-containing family member C2                      |
| 847 | Q96HP8        | 0.3336   | Transmembrane protein 176A                                      |
| 848 | Q92643        | 0.3333   | GPI-anchor transamidase                                         |
| 849 | O15321        | 0.3331   | Transmembrane 9 superfamily protein member 1                    |
| 850 | Q86WU2        | 0.3325   | Probable D-lactate dehydrogenase, mitochondrial                 |
| 851 | Q9NQ90        | 0.3321   | Transmembrane protein 16B                                       |
| 852 | Q9ULK4        | 0.3318   | CRSP complex subunit 3                                          |
| 853 | Q9NV66        | 0.3312   | tRNA wybutosine-synthesizing protein 1 homolog A                |
| 854 | Q6ZVN8        | 0.3311   | Hemojuvelin                                                     |
| 855 | Q8NE62        | 0.3303   | Choline dehydrogenase, mitochondrial                            |

| No. | Swiss-Prot AC | Distance | Protein Name                                                           |
|-----|---------------|----------|------------------------------------------------------------------------|
| 856 | Q5VUY0        | 0.3298   | Arylacetamide deacetylase-like 3                                       |
| 857 | O76036        | 0.3298   | Natural cytotoxicity triggering receptor 1                             |
| 858 | Q9Y231        | 0.3295   | Alpha-(1,3)-fucosyltransferase                                         |
| 859 | Q5VT40        | 0.3287   | Protein FAM78B                                                         |
| 860 | Q4G0Z9        | 0.3278   | Uncharacterized protein C8orf45                                        |
| 861 | O75592        | 0.3275   | Probable E3 ubiquitin-protein ligase MYCBP2                            |
| 862 | P52797        | 0.3262   | Ephrin-A3                                                              |
| 863 | O95352        | 0.3261   | Autophagy-related protein 7                                            |
| 864 | Q6UWU4        | 0.3257   | Uncharacterized protein C6orf89                                        |
| 865 | O75251        | 0.3256   | NADH dehydrogenase [ubiquinone] iron-sulfur protein 7, mitochondrial   |
| 866 | Q8IY47        | 0.3252   | Kelch repeat and BTB domain-containing protein 2                       |
| 867 | P09001        | 0.3249   | Mitochondrial 39S ribosomal protein L3                                 |
| 868 | Q9BPU6        | 0.3247   | Dihydropyrimidinase-related protein 5                                  |
| 869 | P49447        | 0.3247   | Cytochrome b561                                                        |
| 870 | Q9NVR2        | 0.3245   | Integrator complex subunit 10                                          |
| 871 | Q16842        | 0.3233   | CMP-N-acetylneuraminate-beta-galactosamide-alpha-2,3-sialyltransferase |
| 872 | Q96PE3        | 0.3226   | Type I inositol-3,4-bisphosphate 4-phosphatase                         |
| 873 | Q9UJW3        | 0.3224   | DNA                                                                    |
| 874 | O95985        | 0.3224   | DNA topoisomerase 3-beta-1                                             |
| 875 | O75503        | 0.3211   | Ceroid-lipofuscinosis neuronal protein 5                               |
| 876 | Q9UL18        | 0.3207   | Eukaryotic translation initiation factor 2C 1                          |
| 877 | Q9BVL4        | 0.3203   | Selenoprotein O                                                        |
| 878 | O14735        | 0.3202   | CDP-diacylglycerol--inositol 3-phosphatidyltransferase                 |
| 879 | Q6U841        | 0.3182   | Sodium-driven chloride bicarbonate exchanger                           |
| 880 | Q08AF3        | 0.3169   | Schlafen family member 5                                               |
| 881 | Q8N239        | 0.3157   | Kelch-like protein 34                                                  |
| 882 | Q9NX20        | 0.3156   | 39S ribosomal protein L16, mitochondrial                               |
| 883 | Q8I WV7       | 0.3143   | E3 ubiquitin-protein ligase UBR1                                       |
| 884 | O95163        | 0.3142   | Elongator complex protein 1                                            |
| 885 | O15547        | 0.3114   | P2X purinoceptor 6                                                     |
| 886 | P51580        | 0.3112   | Thiopurine S-methyltransferase                                         |
| 887 | Q86YN1        | 0.3101   | Dolichyldiphosphatase 1                                                |
| 888 | Q2MV58        | 0.3093   | Tectonic-1                                                             |
| 889 | P22314        | 0.3083   | Ubiquitin-activating enzyme E1                                         |
| 890 | P50443        | 0.3081   | Sulfate transporter                                                    |
| 891 | P45974        | 0.3068   | Ubiquitin carboxyl-terminal hydrolase 5                                |
| 892 | Q96FK6        | 0.3065   | WD repeat protein 89                                                   |
| 893 | Q8IXV7        | 0.3046   | Kelch domain-containing protein 8B                                     |
| 894 | Q9ULE6        | 0.3043   | Paladin                                                                |
| 895 | Q96MM6        | 0.3041   | Heat shock 70 kDa protein 12B                                          |
| 896 | Q9NTT1        | 0.3036   | Putative ubiquitin-conjugating enzyme E2 D3-like protein               |
| 897 | P24386        | 0.3033   | Rab proteins geranylgeranyltransferase component A 1                   |
| 898 | Q6W3E5        | 0.3032   | Glycerophosphodiester phosphodiesterase domain-containing protein 4    |

| No. | Swiss-Prot AC | Distance | Protein Name                                                                         |
|-----|---------------|----------|--------------------------------------------------------------------------------------|
| 899 | Q8N3I7        | 0.3025   | Bardet-Biedl syndrome 5 protein                                                      |
| 900 | Q6NSW5        | 0.3023   | Protein FAM45B                                                                       |
| 901 | P42357        | 0.3022   | Histidine ammonia-lyase                                                              |
| 902 | Q09328        | 0.3018   | Alpha-1,6-mannosylglycoprotein 6-beta-N-acetylglucosaminyltransferase A              |
| 903 | Q6ZTR5        | 0.3010   | Uncharacterized protein CXorf22                                                      |
| 904 | Q9Y512        | 0.2998   | Sorting and assembly machinery component 50 homolog                                  |
| 905 | Q6UX01        | 0.2998   | Protein LMBR1L                                                                       |
| 906 | P08962        | 0.2991   | CD63 antigen                                                                         |
| 907 | Q58HT5        | 0.2979   | Acyl-CoA wax alcohol acyltransferase 1                                               |
| 908 | Q9H9S5        | 0.2977   | Fukutin-related protein                                                              |
| 909 | P48165        | 0.2974   | Gap junction alpha-8 protein                                                         |
| 910 | Q9UGK8        | 0.2967   | Secretion-regulating guanine nucleotide exchange factor                              |
| 911 | Q13488        | 0.2955   | Vacuolar proton translocating ATPase 116 kDa subunit a isoform 3                     |
| 912 | Q8NFK1        | 0.2950   | Gap junction epsilon-1 protein                                                       |
| 913 | Q8TB61        | 0.2949   | Adenosine 3'-phospho 5'-phosphosulfate transporter 1                                 |
| 914 | P52948        | 0.2947   | Nuclear pore complex protein Nup98-Nup96 [Contains: Nuclear pore complex protein Nup |
| 915 | O94919        | 0.2939   | Endonuclease domain-containing 1 protein                                             |
| 916 | Q8IV20        | 0.2906   | UPF0124 protein C13orf31                                                             |
| 917 | Q12891        | 0.2900   | Hyaluronidase-2                                                                      |
| 918 | P21217        | 0.2891   | Galactoside 3(4)-L-fucosyltransferase                                                |
| 919 | Q00266        | 0.2885   | S-adenosylmethionine synthetase isoform type-1                                       |
| 920 | P48059        | 0.2885   | LIM and senescent cell antigen-like-containing domain protein 1                      |
| 921 | O00400        | 0.2883   | Acetyl-coenzyme A transporter 1                                                      |
| 922 | Q8N8Y2        | 0.2881   | Vacuolar ATP synthase subunit d 2                                                    |
| 923 | Q8NCI6        | 0.2868   | Beta-galactosidase-1-like protein 3                                                  |
| 924 | P62253        | 0.2859   | Ubiquitin-conjugating enzyme E2 G1                                                   |
| 925 | O43490        | 0.2832   | Prominin-1                                                                           |
| 926 | O95487        | 0.2826   | Protein transport protein Sec24B                                                     |
| 927 | Q9NTQ9        | 0.2822   | Gap junction beta-4 protein                                                          |
| 928 | Q8TAA3        | 0.2814   | Proteasome subunit alpha type 7-like                                                 |
| 929 | Q9UIC8        | 0.2806   | Leucine carboxyl methyltransferase 1                                                 |
| 930 | Q9BTY2        | 0.2794   | Plasma alpha-L-fucosidase                                                            |
| 931 | P36957        | 0.2791   | Dihydrolipoyllysine-residue succinyltransferase component of 2                       |
| 932 | Q969N2        | 0.2790   | GPI transamidase component PIG-T                                                     |
| 933 | Q9NVE5        | 0.2789   | Ubiquitin carboxyl-terminal hydrolase 40                                             |
| 934 | P55160        | 0.2787   | Nck-associated protein 1-like                                                        |
| 935 | P28347        | 0.2784   | Transcriptional enhancer factor TEF-1                                                |
| 936 | Q9P291        | 0.2782   | Armadillo repeat-containing X-linked protein 1                                       |
| 937 | Q14409        | 0.2772   | Glycerol kinase, testis specific 1                                                   |
| 938 | Q9NZM6        | 0.2747   | Polycystic kidney disease 2-like 2 protein                                           |
| 939 | O60488        | 0.2737   | Long-chain-fatty-acid--CoA ligase 4                                                  |
| 940 | Q9UNH6        | 0.2730   | Sorting nexin-7                                                                      |
| 941 | P51398        | 0.2730   | Mitochondrial 28S ribosomal protein S29                                              |

| No. | Swiss-Prot AC | Distance | Protein Name                                                           |
|-----|---------------|----------|------------------------------------------------------------------------|
| 942 | Q9HCK5        | 0.2725   | Eukaryotic translation initiation factor 2C 4                          |
| 943 | Q14689        | 0.2717   | Disco-interacting protein 2 homolog A                                  |
| 944 | Q6PI48        | 0.2714   | Aspartyl-tRNA synthetase, mitochondrial                                |
| 945 | Q9NVX2        | 0.2712   | Notchless protein homolog 1                                            |
| 946 | O94855        | 0.2710   | Protein transport protein Sec24D                                       |
| 947 | Q8WY21        | 0.2708   | VPS10 domain-containing receptor SorCS1                                |
| 948 | Q99798        | 0.2700   | Aconitate hydratase, mitochondrial                                     |
| 949 | Q9HCQ5        | 0.2697   | Polypeptide N-acetylgalactosaminyltransferase 9                        |
| 950 | O76062        | 0.2695   | Delta(14)-sterol reductase                                             |
| 951 | P55259        | 0.2686   | Pancreatic secretory granule membrane major glycoprotein GP2           |
| 952 | Q9C0H5        | 0.2678   | Protein KIAA1688                                                       |
| 953 | P29376        | 0.2675   | Leukocyte tyrosine kinase receptor                                     |
| 954 | Q14192        | 0.2667   | Four and a half LIM domains protein 2                                  |
| 955 | Q6ZTY8        | 0.2663   | Putative uncharacterized protein C12orf63                              |
| 956 | Q9UBC3        | 0.2660   | DNA                                                                    |
| 957 | P50876        | 0.2659   | Ubiquitin-conjugating enzyme 7-interacting protein 4                   |
| 958 | P51809        | 0.2632   | Synaptobrevin-like protein 1                                           |
| 959 | O43315        | 0.2632   | Aquaporin-9                                                            |
| 960 | O14744        | 0.2628   | Protein arginine N-methyltransferase 5                                 |
| 961 | O43813        | 0.2626   | LanC-like protein 1                                                    |
| 962 | O15527        | 0.2619   | N-glycosylase/DNA lyase [Includes: 8-oxoguanine DNA glycosylase        |
| 963 | O14841        | 0.2595   | 5-oxoprolinase                                                         |
| 964 | Q96PQ7        | 0.2594   | Kelch-like protein 5                                                   |
| 965 | Q9HCL2        | 0.2591   | Glycerol-3-phosphate acyltransferase, mitochondrial                    |
| 966 | O43286        | 0.2588   | Beta-1,4-galactosyltransferase 5                                       |
| 967 | Q92949        | 0.2585   | Forkhead box protein J1                                                |
| 968 | O60907        | 0.2582   | F-box-like/WD repeat protein TBL1X                                     |
| 969 | Q96JG8        | 0.2580   | Melanoma-associated antigen D4                                         |
| 970 | Q96GC9        | 0.2576   | Transmembrane protein 49                                               |
| 971 | O75562        | 0.2573   | Protein HFSE-1                                                         |
| 972 | O75533        | 0.2573   | Splicing factor 3B subunit 1                                           |
| 973 | Q16342        | 0.2566   | Programmed cell death protein 2                                        |
| 974 | P42695        | 0.2562   | Condensin-II complex subunit D3                                        |
| 975 | P22083        | 0.2562   | Alpha-(1,3)-fucosyltransferase                                         |
| 976 | Q96J01        | 0.2555   | THO complex subunit 3                                                  |
| 977 | Q8ND61        | 0.2555   | Uncharacterized protein C3orf20                                        |
| 978 | Q13505        | 0.2548   | Metaxin-1                                                              |
| 979 | O75140        | 0.2545   | DEP domain-containing protein 5                                        |
| 980 | O15143        | 0.2541   | Actin-related protein 2/3 complex subunit 1B                           |
| 981 | Q9H0R1        | 0.2517   | Uncharacterized protein C14orf108                                      |
| 982 | Q9UKG4        | 0.2508   | Solute carrier family 13 member 4                                      |
| 983 | Q9BUN8        | 0.2483   | Derlin-1                                                               |
| 984 | P31930        | 0.2473   | Ubiquinol-cytochrome-c reductase complex core protein 1, mitochondrial |

| No.  | Swiss-Prot AC | Distance | Protein Name                                                                      |
|------|---------------|----------|-----------------------------------------------------------------------------------|
| 985  | Q8IUX1        | 0.2472   | Transmembrane protein 126B                                                        |
| 986  | Q9BZW4        | 0.2461   | Transmembrane 6 superfamily member 2                                              |
| 987  | Q96JD4        | 0.2458   | Uncharacterized protein C6orf114                                                  |
| 988  | Q32P44        | 0.2455   | Echinoderm microtubule-associated protein-like 3                                  |
| 989  | Q9P0N8        | 0.2454   | E3 ubiquitin-protein ligase MARCH2                                                |
| 990  | Q8N485        | 0.2447   | Protein limb expression 1 homolog                                                 |
| 991  | Q09019        | 0.2432   | Dystrophia myotonica WD repeat-containing protein                                 |
| 992  | O60909        | 0.2431   | Beta-1,4-galactosyltransferase 2                                                  |
| 993  | O14802        | 0.2431   | DNA-directed RNA polymerase III largest subunit                                   |
| 994  | Q96RY7        | 0.2425   | Intraflagellar transport 140 homolog                                              |
| 995  | Q7Z3K3        | 0.2422   | Pogo transposable element with ZNF domain                                         |
| 996  | Q9H6U8        | 0.2411   | Alpha-1,2-mannosyltransferase ALG9                                                |
| 997  | Q9HBK9        | 0.2409   | Arsenite methyltransferase                                                        |
| 998  | Q96EP9        | 0.2403   | Sodium/bile acid cotransporter 4                                                  |
| 999  | P78396        | 0.2400   | Cyclin-A1                                                                         |
| 1000 | Q9H3R0        | 0.2387   | JmjC domain-containing histone demethylation protein 3C                           |
| 1001 | O14603        | 0.2384   | PTPN13-like protein, Y-linked                                                     |
| 1002 | Q9BYK8        | 0.2383   | Peroxisomal proliferator-activated receptor A-interacting complex 285 kDa protein |
| 1003 | Q9NRG4        | 0.2379   | SET and MYND domain-containing protein 2                                          |
| 1004 | Q00597        | 0.2368   | Fanconi anemia group C protein                                                    |
| 1005 | Q5SGD2        | 0.2365   | Protein phosphatase 1L                                                            |
| 1006 | P16279        | 0.2365   | Beta-galactosidase-related protein                                                |
| 1007 | Q9ULC6        | 0.2361   | Protein-arginine deiminase type-1                                                 |
| 1008 | P52209        | 0.2357   | 6-phosphogluconate dehydrogenase, decarboxylating                                 |
| 1009 | Q15334        | 0.2354   | Lethal(2) giant larvae protein homolog 1                                          |
| 1010 | Q99999        | 0.2334   | Galactosylceramide sulfotransferase                                               |
| 1011 | Q9Y6N6        | 0.2326   | Laminin subunit gamma-3                                                           |
| 1012 | Q96BI3        | 0.2324   | Gamma-secretase subunit APH-1A                                                    |
| 1013 | Q15392        | 0.2320   | 24-dehydrocholesterol reductase                                                   |
| 1014 | Q8WWT9        | 0.2317   | Solute carrier family 13 member 3                                                 |
| 1015 | O75354        | 0.2279   | Ectonucleoside triphosphate diphosphohydrolase 6                                  |
| 1016 | Q9NX47        | 0.2276   | E3 ubiquitin-protein ligase MARCH5                                                |
| 1017 | Q5U4P2        | 0.2265   | Aspartate beta-hydroxylase domain-containing protein 1                            |
| 1018 | P36969        | 0.2265   | Phospholipid hydroperoxide glutathione peroxidase, mitochondrial                  |
| 1019 | Q8TD91        | 0.2257   | Melanoma-associated antigen C3                                                    |
| 1020 | Q7Z3V4        | 0.2250   | Ubiquitin-protein ligase E3B                                                      |
| 1021 | Q9Y4D2        | 0.2230   | Sn1-specific diacylglycerol lipase alpha                                          |
| 1022 | Q9Y2C4        | 0.2221   | Endonuclease G-like 1                                                             |
| 1023 | Q96F07        | 0.2218   | Cytoplasmic FMR1-interacting protein 2                                            |
| 1024 | O00322        | 0.2214   | Uroplakin-1a                                                                      |
| 1025 | Q9NXE4        | 0.2196   | Sphingomyelin phosphodiesterase 4                                                 |
| 1026 | Q8NE00        | 0.2189   | Transmembrane protein 104                                                         |
| 1027 | Q9HBE1        | 0.2184   | POZ-, AT hook-, and zinc finger-containing protein 1                              |



| No.  | Swiss-Prot AC | Distance | Protein Name                                                        |
|------|---------------|----------|---------------------------------------------------------------------|
| 1028 | Q9Y5P8        | 0.2180   | Serine/threonine-protein phosphatase 2A 48 kDa regulatory subunit B |
| 1029 | Q8IV36        | 0.2180   | Uncharacterized protein C17orf28                                    |
| 1030 | P63244        | 0.2178   | Guanine nucleotide-binding protein subunit beta 2-like 1            |
| 1031 | P28062        | 0.2175   | Proteasome subunit beta type 8                                      |
| 1032 | Q9BXT6        | 0.2160   | Putative helicase Mov1011                                           |
| 1033 | P14902        | 0.2156   | Indoleamine 2,3-dioxygenase                                         |
| 1034 | Q8NCT1        | 0.2144   | Arrestin domain-containing protein 4                                |
| 1035 | Q8IWG1        | 0.2142   | WD repeat protein 63                                                |
| 1036 | Q96MR6        | 0.2137   | WD repeat protein 65                                                |
| 1037 | P51810        | 0.2127   | G-protein coupled receptor 143                                      |
| 1038 | Q8NBE8        | 0.2114   | Kelch-like protein 23                                               |
| 1039 | Q8N865        | 0.2113   | Uncharacterized protein C7orf31                                     |
| 1040 | Q9NXW9        | 0.2081   | Alkylated repair protein alkB homolog 4                             |
| 1041 | Q8NI36        | 0.2079   | WD repeat protein 36                                                |
| 1042 | Q8IXJ6        | 0.2076   | NAD-dependent deacetylase sirtuin-2                                 |
| 1043 | Q8TDN4        | 0.2032   | CDK5 and ABL1 enzyme substrate 1                                    |
| 1044 | P57740        | 0.2025   | Nuclear pore complex protein Nup107                                 |
| 1045 | Q9Y5U5        | 0.2001   | Tumor necrosis factor receptor superfamily member 18                |
| 1046 | Q8ND90        | 0.1984   | Paraneoplastic antigen Ma1                                          |
| 1047 | Q9Y5R4        | 0.1976   | HemK methyltransferase family member 1                              |
| 1048 | Q8TC26        | 0.1975   | Transmembrane protein 163                                           |
| 1049 | O15397        | 0.1975   | Importin-8                                                          |
| 1050 | Q9Y2T2        | 0.1963   | AP-3 complex subunit mu-1                                           |
| 1051 | P52961        | 0.1961   | GPI-linked NAD(P)(+)-arginine ADP-ribosyltransferase 1              |
| 1052 | Q9ULQ0        | 0.1960   | Protein FAM40B                                                      |
| 1053 | O14531        | 0.1959   | Dihydropyrimidinase-related protein 4                               |
| 1054 | Q9UNN5        | 0.1947   | FAS-associated factor 1                                             |
| 1055 | Q9P0I2        | 0.1944   | Transmembrane protein 111                                           |
| 1056 | Q6Q0C0        | 0.1939   | E3 ubiquitin-protein ligase TRAF7                                   |
| 1057 | Q96RT8        | 0.1922   | Gamma-tubulin complex component 5                                   |
| 1058 | Q9UQG0        | 0.1921   | HERV-K_3q27.3 provirus ancestral Pol protein                        |
| 1059 | Q14397        | 0.1917   | Glucokinase regulatory protein                                      |
| 1060 | Q6DCA0        | 0.1909   | AMMECR1-like protein                                                |
| 1061 | Q5MNZ9        | 0.1908   | WD repeat domain phosphoinositide-interacting protein 1             |
| 1062 | Q9H269        | 0.1907   | Vacuolar protein sorting-associated protein 16 homolog              |
| 1063 | P04424        | 0.1906   | Argininosuccinate lyase                                             |
| 1064 | Q96A28        | 0.1904   | SLAM family member 9                                                |
| 1065 | P51606        | 0.1904   | N-acylglucosamine 2-epimerase                                       |
| 1066 | O43809        | 0.1902   | Cleavage and polyadenylation specificity factor 5                   |
| 1067 | Q9BX95        | 0.1891   | Sphingosine-1-phosphate phosphatase 1                               |
| 1068 | Q9BYJ9        | 0.1887   | YTH domain family protein 1                                         |
| 1069 | Q0ZLH3        | 0.1885   | Pejvakin                                                            |
| 1070 | Q9Y2G5        | 0.1878   | GDP-fucose protein O-fucosyltransferase 2                           |

| No.  | Swiss-Prot AC | Distance | Protein Name                                                          |
|------|---------------|----------|-----------------------------------------------------------------------|
| 1071 | Q8NEM8        | 0.1877   | Cytosolic carboxypeptidase 3                                          |
| 1072 | Q9H4D5        | 0.1874   | Nuclear RNA export factor 3                                           |
| 1073 | Q9H999        | 0.1869   | Pantothenate kinase 3                                                 |
| 1074 | O60347        | 0.1868   | TBC1 domain family member 12                                          |
| 1075 | Q2T9K0        | 0.1864   | Transmembrane protein 44                                              |
| 1076 | Q68D06        | 0.1860   | Schlafen family member 13                                             |
| 1077 | Q13087        | 0.1845   | Protein disulfide-isomerase A2                                        |
| 1078 | P17643        | 0.1835   | 5,6-dihydroxyindole-2-carboxylic acid oxidase                         |
| 1079 | P54868        | 0.1833   | Hydroxymethylglutaryl-CoA synthase, mitochondrial                     |
| 1080 | Q8N2U9        | 0.1824   | PQ-loop repeat-containing protein 1                                   |
| 1081 | O75691        | 0.1819   | Small subunit processome component 20 homolog                         |
| 1082 | Q5VXU1        | 0.1817   | T-cell lymphoma breakpoint associated target protein 1                |
| 1083 | O43868        | 0.1811   | Sodium/nucleoside cotransporter 2                                     |
| 1084 | Q6NXR0        | 0.1810   | Interferon-inducible GTPase 5                                         |
| 1085 | Q9BXJ3        | 0.1798   | Complement C1q tumor necrosis factor-related protein 4                |
| 1086 | Q96MF6        | 0.1796   | Protein COQ10 A, mitochondrial                                        |
| 1087 | Q9H841        | 0.1792   | NIPA-like protein 2                                                   |
| 1088 | Q15031        | 0.1783   | Probable leucyl-tRNA synthetase, mitochondrial                        |
| 1089 | P78346        | 0.1775   | Ribonuclease P protein subunit p30                                    |
| 1090 | Q9UIJ5        | 0.1774   | Palmitoyltransferase ZDHHC2                                           |
| 1091 | Q8NHP8        | 0.1761   | LAMA-like protein 2                                                   |
| 1092 | Q13867        | 0.1761   | Bleomycin hydrolase                                                   |
| 1093 | Q9GZS0        | 0.1756   | Dynein intermediate chain 2, axonemal                                 |
| 1094 | O95807        | 0.1749   | Transmembrane protein 50A                                             |
| 1095 | Q9BX51        | 0.1741   | Gamma-glutamyltransferase-like protein 6                              |
| 1096 | Q8TDY3        | 0.1741   | Actin-related protein T2                                              |
| 1097 | P49279        | 0.1739   | Natural resistance-associated macrophage protein 1                    |
| 1098 | O75604        | 0.1739   | Ubiquitin carboxyl-terminal hydrolase 2                               |
| 1099 | Q7Z4G4        | 0.1724   | tRNA guanosine-2'-O-methyltransferase TRM11 homolog                   |
| 1100 | Q5TD97        | 0.1723   | Four and a half LIM domains protein 5                                 |
| 1101 | P60900        | 0.1721   | Proteasome subunit alpha type 6                                       |
| 1102 | O15160        | 0.1704   | DNA-directed RNA polymerase I 40 kDa polypeptide                      |
| 1103 | Q49AN0        | 0.1703   | Cryptochrome-2                                                        |
| 1104 | Q9H6U6        | 0.1700   | Breast carcinoma amplified sequence 3                                 |
| 1105 | O95445        | 0.1699   | Apolipoprotein M                                                      |
| 1106 | Q12770        | 0.1694   | Sterol regulatory element-binding protein cleavage-activating protein |
| 1107 | Q8WV07        | 0.1688   | Oral cancer overexpressed protein 1                                   |
| 1108 | O15503        | 0.1688   | Insulin-induced gene 1 protein                                        |
| 1109 | Q6ZRR5        | 0.1681   | Transmembrane protein 136                                             |
| 1110 | P0C2W1        | 0.1680   | F-box/SPRY domain-containing protein 1                                |
| 1111 | Q14315        | 0.1675   | Filamin-C                                                             |
| 1112 | Q96BW1        | 0.1662   | Uracil phosphoribosyltransferase                                      |
| 1113 | Q86W28        | 0.1655   | NACHT, LRR and PYD domains-containing protein 8                       |

| No.  | Swiss-Prot AC | Distance | Protein Name                                                                  |
|------|---------------|----------|-------------------------------------------------------------------------------|
| 1114 | Q9Y2P5        | 0.1650   | Bile acyl-CoA synthetase                                                      |
| 1115 | Q6NW40        | 0.1618   | RGM domain family member B                                                    |
| 1116 | Q7Z739        | 0.1613   | YTH domain family protein 3                                                   |
| 1117 | P60201        | 0.1609   | Myelin proteolipid protein                                                    |
| 1118 | Q6ZMZ0        | 0.1598   | IBR domain-containing protein 3                                               |
| 1119 | Q14353        | 0.1594   | Guanidinoacetate N-methyltransferase                                          |
| 1120 | Q9HA72        | 0.1591   | Protein FAM26B                                                                |
| 1121 | O14746        | 0.1586   | Telomerase reverse transcriptase                                              |
| 1122 | Q3MJ13        | 0.1585   | WD repeat protein 72                                                          |
| 1123 | Q9HBV2        | 0.1577   | Sperm acrosome membrane-associated protein 1                                  |
| 1124 | Q9P2N7        | 0.1568   | Kelch-like protein 13                                                         |
| 1125 | Q96CW1        | 0.1564   | AP-2 complex subunit mu-1                                                     |
| 1126 | Q9H7F4        | 0.1539   | Transmembrane protein 185B                                                    |
| 1127 | P33991        | 0.1538   | DNA replication licensing factor MCM4                                         |
| 1128 | O75083        | 0.1536   | WD repeat protein 1                                                           |
| 1129 | Q9Y217        | 0.1521   | Myotubularin-related protein 6                                                |
| 1130 | Q96I51        | 0.1516   | Williams-Beuren syndrome chromosome region 16 protein                         |
| 1131 | Q04671        | 0.1515   | P protein                                                                     |
| 1132 | Q9H4L4        | 0.1506   | Sentrin-specific protease 3                                                   |
| 1133 | O60522        | 0.1479   | Tudor domain-containing protein 6                                             |
| 1134 | Q9NXR7        | 0.1469   | Protein BRE                                                                   |
| 1135 | O75426        | 0.1464   | F-box only protein 24                                                         |
| 1136 | Q96SL4        | 0.1452   | Glutathione peroxidase 7                                                      |
| 1137 | P06133        | 0.1446   | UDP-glucuronosyltransferase 2B4                                               |
| 1138 | Q9NRG9        | 0.1444   | Aladin                                                                        |
| 1139 | Q13530        | 0.1441   | Serine incorporator 3                                                         |
| 1140 | Q96JB1        | 0.1437   | Ciliary dynein heavy chain 8                                                  |
| 1141 | P53992        | 0.1429   | Protein transport protein Sec24C                                              |
| 1142 | A0FGR8        | 0.1428   | Protein FAM62B                                                                |
| 1143 | Q8NEG0        | 0.1425   | Protein FAM71C                                                                |
| 1144 | Q9Y6U3        | 0.1424   | Adseverin                                                                     |
| 1145 | Q3B7J2        | 0.1401   | Glucose-fructose oxidoreductase domain-containing protein 2                   |
| 1146 | Q13564        | 0.1394   | NEDD8-activating enzyme E1 regulatory subunit                                 |
| 1147 | Q9Y2G8        | 0.1388   | DnaJ homolog subfamily C member 16                                            |
| 1148 | Q12765        | 0.1373   | Secernin-1                                                                    |
| 1149 | Q5JW98        | 0.1360   | Protein FAM26D                                                                |
| 1150 | Q9UKW6        | 0.1357   | ETS-related transcription factor Elf-5                                        |
| 1151 | O96006        | 0.1345   | Zinc finger BED domain-containing protein 1                                   |
| 1152 | Q92993        | 0.1321   | Histone acetyltransferase HTATIP                                              |
| 1153 | P04843        | 0.1318   | Dolichyl-diphosphooligosaccharide--protein glycosyltransferase 67 kDa subunit |
| 1154 | Q96EW2        | 0.1315   | HSPB1-associated protein 1                                                    |
| 1155 | Q6N075        | 0.1310   | Major facilitator superfamily domain-containing protein 5                     |
| 1156 | Q9HC58        | 0.1304   | Sodium/potassium/calcium exchanger 3                                          |

| No.  | Swiss-Prot AC | Distance | Protein Name                                                                |
|------|---------------|----------|-----------------------------------------------------------------------------|
| 1157 | Q8TAT6        | 0.1294   | Nuclear protein localization protein 4 homolog                              |
| 1158 | Q96KG9        | 0.1290   | N-terminal kinase-like protein                                              |
| 1159 | Q9BT30        | 0.1271   | Alkylated repair protein alkB homolog 7                                     |
| 1160 | Q8WXE9        | 0.1261   | Stonin-2                                                                    |
| 1161 | Q96JJ3        | 0.1259   | Engulfment and cell motility protein 2                                      |
| 1162 | Q9UH17        | 0.1249   | Probable DNA dC-                                                            |
| 1163 | Q9NWX6        | 0.1247   | Probable tRNA(His) guanylyltransferase                                      |
| 1164 | Q9BZ71        | 0.1243   | Membrane-associated phosphatidylinositol transfer protein 3                 |
| 1165 | O00526        | 0.1236   | Uroplakin-2                                                                 |
| 1166 | Q9HBU6        | 0.1227   | Ethanolamine kinase 1                                                       |
| 1167 | Q9UJX0        | 0.1202   | Oxidative stress induced growth inhibitor 1                                 |
| 1168 | P54922        | 0.1193   | [Protein ADP-ribosylarginine] hydrolase                                     |
| 1169 | Q8TCF1        | 0.1187   | AN1-type zinc finger protein 1                                              |
| 1170 | Q14195        | 0.1181   | Dihydropyrimidinase-related protein 3                                       |
| 1171 | Q96MK3        | 0.1178   | Protein FAM20A                                                              |
| 1172 | Q14997        | 0.1178   | Proteasome activator complex subunit 4                                      |
| 1173 | Q8IV42        | 0.1172   | L-seryl-tRNA(Sec) kinase                                                    |
| 1174 | Q96BY7        | 0.1169   | Uncharacterized protein C14orf103                                           |
| 1175 | P82675        | 0.1167   | Mitochondrial 28S ribosomal protein S5                                      |
| 1176 | Q9HCE1        | 0.1164   | Putative helicase MOV-10                                                    |
| 1177 | P19404        | 0.1153   | NADH dehydrogenase [ubiquinone] flavoprotein 2, mitochondrial               |
| 1178 | Q9Y2Q3        | 0.1146   | Glutathione S-transferase kappa 1                                           |
| 1179 | Q9Y277        | 0.1141   | Voltage-dependent anion-selective channel protein 3                         |
| 1180 | Q96RL7        | 0.1132   | Vacuolar protein sorting-associated protein 13A                             |
| 1181 | Q86XE5        | 0.1132   | Dihydrodipicolinate synthase-like, mitochondrial                            |
| 1182 | Q9Y223        | 0.1131   | Bifunctional UDP-N-acetylglucosamine 2-epimerase/N-acetylmannosamine kinase |
| 1183 | Q8TCT0        | 0.1131   | Ceramide kinase                                                             |
| 1184 | P55265        | 0.1126   | Double-stranded RNA-specific adenosine deaminase                            |
| 1185 | Q8TE73        | 0.1122   | Ciliary dynein heavy chain 5                                                |
| 1186 | Q9NYU1        | 0.1118   | UDP-glucose:glycoprotein glucosyltransferase 2                              |
| 1187 | P29120        | 0.1116   | Neuroendocrine convertase 1                                                 |
| 1188 | Q9UJA2        | 0.1108   | Cardiolipin synthetase                                                      |
| 1189 | Q14019        | 0.1103   | Coactosin-like protein                                                      |
| 1190 | Q8NFP9        | 0.1095   | Protein neurobeachin                                                        |
| 1191 | O43511        | 0.1095   | Pendrin                                                                     |
| 1192 | O00418        | 0.1080   | Elongation factor 2 kinase                                                  |
| 1193 | Q5T4F7        | 0.1062   | Secreted frizzled-related protein 5                                         |
| 1194 | Q9Y2A7        | 0.1056   | Nck-associated protein 1                                                    |
| 1195 | Q9HDD0        | 0.1035   | HRAS-like suppressor                                                        |
| 1196 | Q8TCS8        | 0.1034   | Polyribonucleotide nucleotidyltransferase 1, mitochondrial                  |
| 1197 | Q9UBL9        | 0.1026   | P2X purinoceptor 2                                                          |
| 1198 | Q9NST1        | 0.1010   | Adiponutrin                                                                 |
| 1199 | Q969V3        | 0.1006   | Nicalin                                                                     |

| No.  | Swiss-Prot AC | Distance | Protein Name                                              |
|------|---------------|----------|-----------------------------------------------------------|
| 1200 | Q9BR09        | 0.0993   | Neuralized-like protein 2                                 |
| 1201 | Q96K19        | 0.0992   | RING finger protein 170                                   |
| 1202 | Q9HDB5        | 0.0991   | Neurexin-3-beta                                           |
| 1203 | Q6ZQW0        | 0.0988   | Indoleamine 2,3-dioxygenase-like protein 1                |
| 1204 | Q7Z7G8        | 0.0987   | Vacuolar protein sorting-associated protein 13B           |
| 1205 | Q99755        | 0.0985   | Phosphatidylinositol-4-phosphate 5-kinase type-1 alpha    |
| 1206 | Q9UJ55        | 0.0979   | MAGE-like protein 2                                       |
| 1207 | O60716        | 0.0976   | Catenin delta-1                                           |
| 1208 | Q9Y5Q8        | 0.0969   | General transcription factor 3C polypeptide 5             |
| 1209 | O75419        | 0.0958   | CDC45-related protein                                     |
| 1210 | Q8NCL8        | 0.0957   | Transmembrane protein 116                                 |
| 1211 | Q7Z5M5        | 0.0957   | Transmembrane channel-like protein 3                      |
| 1212 | Q9HB90        | 0.0955   | Ras-related GTP-binding protein C                         |
| 1213 | Q14145        | 0.0948   | Kelch-like ECH-associated protein 1                       |
| 1214 | Q16555        | 0.0928   | Dihydropyrimidinase-related protein 2                     |
| 1215 | P50461        | 0.0924   | Cysteine and glycine-rich protein 3                       |
| 1216 | Q8N9N2        | 0.0923   | Activating signal cointegrator 1 complex subunit 1        |
| 1217 | Q13724        | 0.0922   | Mannosyl-oligosaccharide glucosidase                      |
| 1218 | Q8N966        | 0.0907   | Putative palmitoyltransferase ZDHHC22                     |
| 1219 | O15457        | 0.0884   | MutS protein homolog 4                                    |
| 1220 | Q9Y2Z2        | 0.0881   | Protein MTO1 homolog, mitochondrial                       |
| 1221 | Q9BSY9        | 0.0881   | UPF0326 protein C1orf121                                  |
| 1222 | Q96EB1        | 0.0881   | Elongator complex protein 4                               |
| 1223 | Q08334        | 0.0878   | Interleukin-10 receptor beta chain                        |
| 1224 | Q9H0E7        | 0.0870   | Ubiquitin carboxyl-terminal hydrolase 44                  |
| 1225 | Q6Y288        | 0.0865   | Beta-1,3-glucosyltransferase                              |
| 1226 | O60476        | 0.0846   | Mannosyl-oligosaccharide 1,2-alpha-mannosidase IB         |
| 1227 | O75366        | 0.0840   | Advillin                                                  |
| 1228 | P40937        | 0.0839   | Replication factor C subunit 5                            |
| 1229 | Q15904        | 0.0838   | Vacuolar ATP synthase subunit S1                          |
| 1230 | Q9UKT8        | 0.0835   | F-box/WD repeat protein 2                                 |
| 1231 | P27105        | 0.0833   | Erythrocyte band 7 integral membrane protein              |
| 1232 | P49736        | 0.0831   | DNA replication licensing factor MCM2                     |
| 1233 | Q9NTN3        | 0.0829   | UDP-glucuronic acid/UDP-N-acetylgalactosamine transporter |
| 1234 | Q9Y4I5        | 0.0827   | Tesmin                                                    |
| 1235 | Q9P2C4        | 0.0817   | Transmembrane protein 181                                 |
| 1236 | Q9H1Y0        | 0.0802   | Autophagy protein 5                                       |
| 1237 | Q8NHH1        | 0.0793   | Tubulin--tyrosine ligase-like protein 11                  |
| 1238 | Q9NSD9        | 0.0791   | Phenylalanyl-tRNA synthetase beta chain                   |
| 1239 | Q8NFM7        | 0.0790   | Interleukin-17 receptor D                                 |
| 1240 | Q13614        | 0.0783   | Myotubularin-related protein 2                            |
| 1241 | O43913        | 0.0772   | Origin recognition complex subunit 5                      |
| 1242 | Q96FG2        | 0.0771   | ELMO domain-containing protein 3                          |

| No.  | Swiss-Prot AC | Distance | Protein Name                                                           |
|------|---------------|----------|------------------------------------------------------------------------|
| 1243 | Q9Y2M2        | 0.0764   | Uncharacterized protein C3orf32                                        |
| 1244 | P09958        | 0.0747   | Furin                                                                  |
| 1245 | Q15629        | 0.0743   | Translocation-associated membrane protein 1                            |
| 1246 | Q9UL17        | 0.0737   | T-box transcription factor TBX21                                       |
| 1247 | Q6ZRP7        | 0.0735   | Sulfhydryl oxidase 2                                                   |
| 1248 | P51784        | 0.0723   | Ubiquitin carboxyl-terminal hydrolase 11                               |
| 1249 | P67812        | 0.0715   | Signal peptidase complex catalytic subunit SEC11A                      |
| 1250 | O60729        | 0.0703   | Dual specificity protein phosphatase CDC14B                            |
| 1251 | Q8N0S6        | 0.0701   | Centromere protein L                                                   |
| 1252 | O00423        | 0.0700   | Echinoderm microtubule-associated protein-like 1                       |
| 1253 | Q9UJH8        | 0.0699   | Meteorin                                                               |
| 1254 | Q96MV8        | 0.0677   | Palmitoyltransferase ZDHHC15                                           |
| 1255 | Q969F9        | 0.0676   | Hermansky-Pudlak syndrome 3 protein                                    |
| 1256 | Q9NUT2        | 0.0674   | ATP-binding cassette sub-family B member 8, mitochondrial              |
| 1257 | Q8IUX4        | 0.0673   | DNA dC-                                                                |
| 1258 | P61077        | 0.0673   | Ubiquitin-conjugating enzyme E2 D3                                     |
| 1259 | Q9NVQ4        | 0.0662   | Fas apoptotic inhibitory molecule 1                                    |
| 1260 | O15195        | 0.0656   | Villin-like protein                                                    |
| 1261 | Q8TBX8        | 0.0647   | Phosphatidylinositol-4-phosphate 5-kinase type-2 gamma                 |
| 1262 | Q07507        | 0.0624   | Dermatopontin                                                          |
| 1263 | Q96JB6        | 0.0617   | Lysyl oxidase homolog 4                                                |
| 1264 | Q9UJT9        | 0.0614   | F-box/LRR-repeat protein 7                                             |
| 1265 | P14735        | 0.0614   | Insulin-degrading enzyme                                               |
| 1266 | P11047        | 0.0606   | Laminin subunit gamma-1                                                |
| 1267 | Q9Y5L3        | 0.0601   | Ectonucleoside triphosphate diphosphohydrolase 2                       |
| 1268 | Q14032        | 0.0586   | Bile acid CoA:amino acid N-acyltransferase                             |
| 1269 | Q53HC5        | 0.0582   | Kelch-like protein 26                                                  |
| 1270 | Q9H3H5        | 0.0569   | UDP-N-acetylglucosamine--dolichyl-phosphate N                          |
| 1271 | Q16526        | 0.0569   | Cryptochrome-1                                                         |
| 1272 | Q92826        | 0.0568   | Homeobox protein Hox-B13                                               |
| 1273 | Q11206        | 0.0567   | CMP-N-acetylneuraminic acid-beta-galactosaminide-2,3-sialyltransferase |
| 1274 | Q5U5R9        | 0.0562   | Probable E3 ubiquitin-protein ligase HECTD2                            |
| 1275 | P82933        | 0.0558   | 28S ribosomal protein S9, mitochondrial                                |
| 1276 | O14926        | 0.0553   | Fascin-2                                                               |
| 1277 | Q9NV64        | 0.0552   | Transmembrane protein 39A                                              |
| 1278 | Q9NRR6        | 0.0527   | 72 kDa inositol polyphosphate 5-phosphatase                            |
| 1279 | Q14DG7        | 0.0524   | Transmembrane protein 132B                                             |
| 1280 | P45381        | 0.0520   | Aspartoacylase                                                         |
| 1281 | Q10469        | 0.0516   | Alpha-1,6-mannosyl-glycoprotein 2-beta-N-acetylglucosaminyltransferase |
| 1282 | Q5JUQ0        | 0.0507   | Protein FAM78A                                                         |
| 1283 | P58401        | 0.0505   | Neurexin-2-beta                                                        |
| 1284 | Q9UJH6        | 0.0496   | Carbohydrate kinase-like protein                                       |
| 1285 | Q9NTM9        | 0.0495   | Copper homeostasis protein cutC homolog                                |

| No.  | Swiss-Prot AC | Distance | Protein Name                                                         |
|------|---------------|----------|----------------------------------------------------------------------|
| 1286 | P41247        | 0.0492   | Patatin-like phospholipase domain-containing protein 4               |
| 1287 | Q96JH7        | 0.0491   | Deubiquitinating protein VCIP135                                     |
| 1288 | Q7Z419        | 0.0491   | E3 ubiquitin-protein ligase IBRDC2                                   |
| 1289 | Q96F86        | 0.0489   | Enhancer of mRNA-decapping protein 3                                 |
| 1290 | O60318        | 0.0485   | 80 kDa MCM3-associated protein                                       |
| 1291 | Q7L5Y6        | 0.0482   | DET1 homolog                                                         |
| 1292 | Q15063        | 0.0475   | Periostin                                                            |
| 1293 | Q96CP7        | 0.0466   | TLC domain-containing protein 1                                      |
| 1294 | Q6X4W1        | 0.0448   | Nasal embryonic luteinizing hormone-releasing hormone factor         |
| 1295 | P35125        | 0.0437   | Ubiquitin carboxyl-terminal hydrolase 6                              |
| 1296 | Q9Y4L5        | 0.0436   | Zinc finger protein 364                                              |
| 1297 | Q96T60        | 0.0431   | Bifunctional polynucleotide phosphatase/kinase                       |
| 1298 | Q9H2T7        | 0.0423   | Ran-binding protein 17                                               |
| 1299 | Q969S0        | 0.0423   | UDP-xylose and UDP-N-acetylglucosamine transporter                   |
| 1300 | O75132        | 0.0419   | Zinc finger BED domain-containing protein 4                          |
| 1301 | Q75V66        | 0.0416   | Transmembrane protein 16E                                            |
| 1302 | O60930        | 0.0415   | Ribonuclease H1                                                      |
| 1303 | P49257        | 0.0398   | ERGIC-53 protein                                                     |
| 1304 | P78333        | 0.0393   | Glypican-5                                                           |
| 1305 | Q99436        | 0.0386   | Proteasome subunit beta type 7                                       |
| 1306 | Q9H981        | 0.0383   | Actin-related protein 8                                              |
| 1307 | P62837        | 0.0382   | Ubiquitin-conjugating enzyme E2 D2                                   |
| 1308 | Q8WWR8        | 0.0381   | Sialidase-4                                                          |
| 1309 | P46459        | 0.0376   | Vesicle-fusing ATPase                                                |
| 1310 | P29017        | 0.0374   | T-cell surface glycoprotein CD1c                                     |
| 1311 | Q13939        | 0.0369   | Calicin                                                              |
| 1312 | O95759        | 0.0361   | TBC1 domain family member 8                                          |
| 1313 | O95278        | 0.0355   | Laforin                                                              |
| 1314 | Q9Y2X0        | 0.0352   | Thyroid hormone receptor-associated protein complex 95 kDa component |
| 1315 | O75845        | 0.0343   | Lathosterol oxidase                                                  |
| 1316 | Q9UKF5        | 0.0342   | ADAM 29                                                              |
| 1317 | Q6ZRI8        | 0.0315   | Putative Rho GTPase-activating protein FLJ46335                      |
| 1318 | Q8NFB2        | 0.0306   | Transmembrane protein 185A                                           |
| 1319 | P42785        | 0.0304   | Lysosomal Pro-X carboxypeptidase                                     |
| 1320 | Q6ZVK1        | 0.0294   | Transmembrane protein 179                                            |
| 1321 | P57071        | 0.0271   | PR domain zinc finger protein 15                                     |
| 1322 | P11279        | 0.0267   | Lysosome-associated membrane glycoprotein 1                          |
| 1323 | P36269        | 0.0263   | Gamma-glutamyltransferase 5                                          |
| 1324 | Q8N1G2        | 0.0262   | Protein KIAA0082                                                     |
| 1325 | Q9Y2L5        | 0.0260   | Protein TRS85 homolog                                                |
| 1326 | O60725        | 0.0260   | Protein-S-isoprenylcysteine O-methyltransferase                      |
| 1327 | P48664        | 0.0251   | Excitatory amino acid transporter 4                                  |
| 1328 | Q96AX1        | 0.0250   | Vacuolar protein sorting-associated protein 33A                      |

| No.  | Swiss-Prot AC | Distance | Protein Name                                                        |
|------|---------------|----------|---------------------------------------------------------------------|
| 1329 | Q7KZF4        | 0.0240   | Staphylococcal nuclease domain-containing protein 1                 |
| 1330 | Q6YHK3        | 0.0235   | CD109 antigen                                                       |
| 1331 | Q92901        | 0.0228   | 60S ribosomal protein L3-like                                       |
| 1332 | O75829        | 0.0224   | Chondromodulin-1                                                    |
| 1333 | Q8TC59        | 0.0212   | Piwi-like protein 2                                                 |
| 1334 | Q9Y216        | 0.0205   | Myotubularin-related protein 7                                      |
| 1335 | Q6ZRQ5        | 0.0205   | Uncharacterized protein C6orf167                                    |
| 1336 | Q9NQC7        | 0.0195   | Probable ubiquitin carboxyl-terminal hydrolase CYLD                 |
| 1337 | Q2TAY7        | 0.0189   | Smu-1 suppressor of mec-8 and unc-52 protein homolog                |
| 1338 | O00337        | 0.0186   | Sodium/nucleoside cotransporter 1                                   |
| 1339 | O00755        | 0.0183   | Protein Wnt-7a                                                      |
| 1340 | Q9H4H8        | 0.0174   | Protein FAM83D                                                      |
| 1341 | P47985        | 0.0160   | Ubiquinol-cytochrome c reductase iron-sulfur subunit, mitochondrial |
| 1342 | Q86XP6        | 0.0153   | Gastrokine-2                                                        |
| 1343 | O75695        | 0.0149   | Protein XRP2                                                        |
| 1344 | Q9H0V9        | 0.0144   | VIP36-like protein                                                  |
| 1345 | Q96CN7        | 0.0143   | Isochorismatase domain-containing protein 1                         |
| 1346 | Q5JWF2        | 0.0143   | Guanine nucleotide-binding protein G(s) subunit alpha isoforms XLas |
| 1347 | O43427        | 0.0141   | Acidic fibroblast growth factor intracellular-binding protein       |
| 1348 | P61647        | 0.0136   | Alpha-2,8-sialyltransferase 8F                                      |
| 1349 | Q7Z7B1        | 0.0135   | Phosphatidylinositol-glycan biosynthesis class W protein            |
| 1350 | P57678        | 0.0133   | Component of gems 4                                                 |
| 1351 | Q9HC96        | 0.0128   | Calpain-10                                                          |
| 1352 | Q86U70        | 0.0121   | LIM domain-binding protein 1                                        |
| 1353 | O95674        | 0.0112   | Phosphatidate cytidyltransferase 2                                  |
| 1354 | Q13145        | 0.0107   | BMP and activin membrane-bound inhibitor homolog                    |
| 1355 | Q9GZU3        | 0.0101   | Transmembrane protein 39B                                           |
| 1356 | Q7L576        | 0.0101   | Cytoplasmic FMR1-interacting protein 1                              |
| 1357 | Q9BZQ4        | 0.0098   | Nicotinamide mononucleotide adenylyltransferase 2                   |
| 1358 | Q9P2M4        | 0.0095   | TBC1 domain family member 14                                        |
| 1359 | Q16531        | 0.0083   | DNA damage-binding protein 1                                        |
| 1360 | Q9UKV8        | 0.0079   | Eukaryotic translation initiation factor 2C 2                       |
| 1361 | P16278        | 0.0078   | Beta-galactosidase                                                  |
| 1362 | O95147        | 0.0077   | Dual specificity protein phosphatase 14                             |
| 1363 | P63132        | 0.0073   | HERV-K_19p13.11 provirus ancestral Pol protein                      |
| 1364 | Q8NEG7        | 0.0068   | Protein FAM116B                                                     |
| 1365 | Q9HBV1        | 0.0066   | Popeye domain-containing protein 3                                  |
| 1366 | Q15181        | 0.0063   | Inorganic pyrophosphatase                                           |
| 1367 | O14791        | 0.0063   | Apolipoprotein-L1                                                   |
| 1368 | Q5VSL9        | 0.0061   | Protein FAM40A                                                      |
| 1369 | Q8TAP6        | 0.0056   | Centrosomal protein of 76 kDa                                       |
| 1370 | Q14139        | 0.0056   | Ubiquitin conjugation factor E4 A                                   |
| 1371 | P47897        | 0.0054   | Glutaminyl-tRNA synthetase                                          |



---

| <b>No.</b> | <b>Swiss-Prot AC</b> | <b>Distance</b> | <b>Protein Name</b>                                              |
|------------|----------------------|-----------------|------------------------------------------------------------------|
| 1372       | Q8IU89               | 0.0043          | LAG1 longevity assurance homolog 3                               |
| 1373       | Q9NP92               | 0.0042          | Mitochondrial 28S ribosomal protein S30                          |
| 1374       | Q9NYW6               | 0.0035          | Taste receptor type 2 member 3                                   |
| 1375       | O95602               | 0.0033          | DNA-directed RNA polymerase I subunit RPA1                       |
| 1376       | Q9Y2B2               | 0.0026          | N-acetylglucosaminyl-phosphatidylinositol de-N-acetylase         |
| 1377       | Q8WVM8               | 0.0026          | Sec1 family domain-containing protein 1                          |
| 1378       | P07942               | 0.0017          | Laminin subunit beta-1                                           |
| 1379       | Q86VN1               | 0.0012          | Vacuolar protein sorting-associated protein 36                   |
| 1380       | P06396               | 0.0010          | Gelsolin                                                         |
| 1381       | Q9UPQ8               | 0.0005          | Transmembrane protein 15                                         |
| 1382       | Q70CQ2               | 0.0005          | Ubiquitin carboxyl-terminal hydrolase 34                         |
| 1383       | P62879               | 0.0004          | Guanine nucleotide-binding protein G(I)/G(S)/G(T) subunit beta 2 |

---
