# Supplementary material for: Prediction of potential drug targets based on simple sequence properties
Source: PubMed Central journal article supplement (PMC2082046; doi:10.1186/1471-2105-8-353), 2007-09-20
Supplement: 1471-2105-8-353-S2.pdf [file 1471-2105-8-353-S2.pdf]

**Table S2. 186 targets of FDA-approved oral small-molecular drugs**

| No. | Swiss-Prot AC | Protein Name                                              |
|-----|---------------|-----------------------------------------------------------|
| 1   | O14732        | Inositol monophosphatase 2                                |
| 2   | O14920        | Inhibitor of nuclear factor kappa-B kinase subunit beta   |
| 3   | O43451        | Maltase-glucoamylase, intestinal [Includes: Maltase       |
| 4   | O60706        | ATP-binding cassette transporter sub-family C member 9    |
| 5   | O76074        | cGMP-specific 3',5'-cyclic phosphodiesterase              |
| 6   | O95180        | Voltage-dependent T-type calcium channel subunit alpha-1H |
| 7   | P00352        | Retinal dehydrogenase 1                                   |
| 8   | P00374        | Dihydrofolate reductase                                   |
| 9   | P00519        | Proto-oncogene tyrosine-protein kinase ABL1               |
| 10  | P00533        | Epidermal growth factor receptor                          |
| 11  | P00747        | Plasminogen                                               |
| 12  | P00750        | Tissue-type plasminogen activator                         |
| 13  | P00813        | Adenosine deaminase                                       |
| 14  | P00918        | Carbonic anhydrase 2                                      |
| 15  | P03372        | Estrogen receptor                                         |
| 16  | P04035        | 3-hydroxy-3-methylglutaryl-coenzyme A reductase           |
| 17  | P04049        | RAF proto-oncogene serine/threonine-protein kinase        |
| 18  | P04150        | Glucocorticoid receptor                                   |
| 19  | P04746        | Pancreatic alpha-amylase                                  |
| 20  | P04818        | Thymidylate synthase                                      |
| 21  | P05023        | Sodium/potassium-transporting ATPase alpha-1 chain        |
| 22  | P05108        | Cytochrome P450 11A1, mitochondrial                       |
| 23  | P05184        | Cytochrome P450 3A3                                       |
| 24  | P06239        | Proto-oncogene tyrosine-protein kinase LCK                |
| 25  | P06241        | Proto-oncogene tyrosine-protein kinase Fyn                |
| 26  | P06276        | Cholinesterase                                            |
| 27  | P06401        | Progesterone receptor                                     |
| 28  | P06858        | Lipoprotein lipase                                        |
| 29  | P07098        | Gastric triacylglycerol lipase                            |
| 30  | P07099        | Epoxide hydrolase 1                                       |
| 31  | P07101        | Tyrosine 3-monooxygenase                                  |
| 32  | P07202        | Thyroid peroxidase                                        |
| 33  | P07437        | Tubulin beta chain                                        |
| 34  | P07550        | Beta-2 adrenergic receptor                                |
| 35  | P07947        | Proto-oncogene tyrosine-protein kinase Yes                |
| 36  | P07949        | Proto-oncogene tyrosine-protein kinase receptor ret       |
| 37  | P08172        | Muscarinic acetylcholine receptor M2                      |
| 38  | P08173        | Muscarinic acetylcholine receptor M4                      |

| <b>No.</b> | <b>Swiss-Prot AC</b> | <b>Protein Name</b>                                                   |
|------------|----------------------|-----------------------------------------------------------------------|
| 39         | P08235               | Mineralocorticoid receptor                                            |
| 40         | P08588               | Beta-1 adrenergic receptor                                            |
| 41         | P08908               | 5-hydroxytryptamine 1A receptor                                       |
| 42         | P08912               | Muscarinic acetylcholine receptor M5                                  |
| 43         | P08913               | Alpha-2A adrenergic receptor                                          |
| 44         | P09619               | Beta platelet-derived growth factor receptor                          |
| 45         | P09917               | Arachidonate 5-lipoxygenase                                           |
| 46         | P10275               | Androgen receptor                                                     |
| 47         | P10276               | Retinoic acid receptor alpha                                          |
| 48         | P10721               | Mast/stem cell growth factor receptor                                 |
| 49         | P10826               | Retinoic acid receptor beta                                           |
| 50         | P10827               | Thyroid hormone receptor alpha                                        |
| 51         | P10828               | Thyroid hormone receptor beta-1                                       |
| 52         | P11229               | Muscarinic acetylcholine receptor M1                                  |
| 53         | P11388               | DNA topoisomerase 2-alpha                                             |
| 54         | P11473               | Vitamin D3 receptor                                                   |
| 55         | P11511               | Cytochrome P450 19A1                                                  |
| 56         | P12235               | ADP/ATP translocase 1                                                 |
| 57         | P12268               | Inosine-5'-monophosphate dehydrogenase 2                              |
| 58         | P12821               | Angiotensin-converting enzyme, somatic isoform                        |
| 59         | P12931               | Proto-oncogene tyrosine-protein kinase Src                            |
| 60         | P13631               | Retinoic acid receptor gamma-1                                        |
| 61         | P14060               | 3 beta-hydroxysteroid dehydrogenase/Delta 5--4-isomerase type I       |
| 62         | P14324               | Farnesyl pyrophosphate synthetase                                     |
| 63         | P14416               | D(2) dopamine receptor                                                |
| 64         | P14867               | Gamma-aminobutyric-acid receptor subunit alpha-1                      |
| 65         | P15056               | B-Raf proto-oncogene serine/threonine-protein kinase                  |
| 66         | P15085               | Carboxypeptidase A1                                                   |
| 67         | P15121               | Aldose reductase                                                      |
| 68         | P15509               | Granulocyte-macrophage colony-stimulating factor receptor alpha chain |
| 69         | P15538               | Cytochrome P450 11B1, mitochondrial                                   |
| 70         | P16233               | Pancreatic triacylglycerol lipase                                     |
| 71         | P16234               | Alpha platelet-derived growth factor receptor                         |
| 72         | P17787               | Neuronal acetylcholine receptor subunit beta-2                        |
| 73         | P17948               | Vascular endothelial growth factor receptor 1                         |
| 74         | P18089               | Alpha-2B adrenergic receptor                                          |
| 75         | P18405               | 3-oxo-5-alpha-steroid 4-dehydrogenase 1                               |
| 76         | P18507               | Gamma-aminobutyric-acid receptor subunit gamma-2                      |
| 77         | P18825               | Alpha-2C adrenergic receptor                                          |
| 78         | P20309               | Muscarinic acetylcholine receptor M3                                  |
| 79         | P20648               | Potassium-transporting ATPase alpha chain 1                           |

| <b>No.</b> | <b>Swiss-Prot AC</b> | <b>Protein Name</b>                               |
|------------|----------------------|---------------------------------------------------|
| 80         | P20711               | Aromatic-L-amino-acid decarboxylase               |
| 81         | P20839               | Inosine-5'-monophosphate dehydrogenase 1          |
| 82         | P21397               | Amine oxidase [flavin-containing] A               |
| 83         | P21554               | Cannabinoid receptor 1                            |
| 84         | P21728               | D(1A) dopamine receptor                           |
| 85         | P21817               | Ryanodine receptor 1                              |
| 86         | P21917               | D(4) dopamine receptor                            |
| 87         | P21918               | D(1B) dopamine receptor                           |
| 88         | P21964               | Catechol O-methyltransferase                      |
| 89         | P22303               | Acetylcholinesterase                              |
| 90         | P23219               | Prostaglandin G/H synthase 1                      |
| 91         | P23284               | Peptidyl-prolyl cis-trans isomerase B             |
| 92         | P23975               | Sodium-dependent noradrenaline transporter        |
| 93         | P24530               | Endothelin B receptor                             |
| 94         | P25021               | Histamine H2 receptor                             |
| 95         | P25100               | Alpha-1D adrenergic receptor                      |
| 96         | P25101               | Endothelin-1 receptor                             |
| 97         | P25103               | Substance-P receptor                              |
| 98         | P27338               | Amine oxidase [flavin-containing] B               |
| 99         | P27815               | cAMP-specific 3',5'-cyclic phosphodiesterase 4A   |
| 100        | P28221               | 5-hydroxytryptamine 1D receptor                   |
| 101        | P28222               | 5-hydroxytryptamine 1B receptor                   |
| 102        | P28223               | 5-hydroxytryptamine 2A receptor                   |
| 103        | P28335               | 5-hydroxytryptamine 2C receptor                   |
| 104        | P29274               | Adenosine A2a receptor                            |
| 105        | P29275               | Adenosine A2b receptor                            |
| 106        | P29317               | Ephrin type-A receptor 2                          |
| 107        | P30518               | Vasopressin V2 receptor                           |
| 108        | P30531               | Sodium- and chloride-dependent GABA transporter 1 |
| 109        | P30542               | Adenosine A1 receptor                             |
| 110        | P30556               | Type-1 angiotensin II receptor                    |
| 111        | P30939               | 5-hydroxytryptamine 1F receptor                   |
| 112        | P31213               | 3-oxo-5-alpha-steroid 4-dehydrogenase 2           |
| 113        | P31350               | Ribonucleoside-diphosphate reductase M2 subunit   |
| 114        | P31645               | Sodium-dependent serotonin transporter            |
| 115        | P32754               | 4-hydroxyphenylpyruvate dioxygenase               |
| 116        | P33765               | Adenosine A3 receptor                             |
| 117        | P34972               | Cannabinoid receptor 2                            |
| 118        | P35348               | Alpha-1A adrenergic receptor                      |
| 119        | P35354               | Prostaglandin G/H synthase 2                      |
| 120        | P35367               | Histamine H1 receptor                             |

| <b>No.</b> | <b>Swiss-Prot AC</b> | <b>Protein Name</b>                                                      |
|------------|----------------------|--------------------------------------------------------------------------|
| 121        | P35368               | Alpha-1B adrenergic receptor                                             |
| 122        | P35372               | Mu-type opioid receptor                                                  |
| 123        | P35462               | D(3) dopamine receptor                                                   |
| 124        | P35498               | Sodium channel protein type 1 subunit alpha                              |
| 125        | P35499               | Sodium channel protein type 4 subunit alpha                              |
| 126        | P35916               | Vascular endothelial growth factor receptor 3                            |
| 127        | P35968               | Vascular endothelial growth factor receptor 2                            |
| 128        | P36888               | FL cytokine receptor                                                     |
| 129        | P37088               | Amiloride-sensitive sodium channel subunit alpha                         |
| 130        | P37231               | Peroxisome proliferator-activated receptor gamma                         |
| 131        | P37288               | Vasopressin V1a receptor                                                 |
| 132        | P38606               | Vacuolar ATP synthase catalytic subunit A                                |
| 133        | P39086               | Glutamate receptor, ionotropic kainate 1                                 |
| 134        | P41143               | Delta-type opioid receptor                                               |
| 135        | P41145               | Kappa-type opioid receptor                                               |
| 136        | P41146               | Nociceptin receptor                                                      |
| 137        | P41180               | Extracellular calcium-sensing receptor                                   |
| 138        | P41595               | 5-hydroxytryptamine 2B receptor                                          |
| 139        | P42261               | Glutamate receptor 1                                                     |
| 140        | P43116               | Prostaglandin E2 receptor EP2 subtype                                    |
| 141        | P43681               | Neuronal acetylcholine receptor subunit alpha-4                          |
| 142        | P46098               | 5-hydroxytryptamine 3 receptor                                           |
| 143        | P47870               | Gamma-aminobutyric-acid receptor subunit beta-2                          |
| 144        | P47901               | Vasopressin V1b receptor                                                 |
| 145        | P47989               | Xanthine dehydrogenase/oxidase                                           |
| 146        | P48039               | Melatonin receptor type 1A                                               |
| 147        | P49286               | Melatonin receptor type 1B                                               |
| 148        | P49895               | Type I iodothyronine deiodinase                                          |
| 149        | P51649               | Succinate semialdehyde dehydrogenase, mitochondrial                      |
| 150        | P51787               | Potassium voltage-gated channel subfamily KQT member 1                   |
| 151        | P54289               | Dihydropyridine-sensitive L-type calcium channel subunits alpha- 2/delta |
| 152        | P55017               | Solute carrier family 12 member 3                                        |
| 153        | P62937               | Peptidyl-prolyl cis-trans isomerase A                                    |
| 154        | P62942               | FK506-binding protein 1A                                                 |
| 155        | P63316               | Troponin C, slow skeletal and cardiac muscles                            |
| 156        | P80404               | 4-aminobutyrate aminotransferase, mitochondrial                          |
| 157        | Q01959               | Sodium-dependent dopamine transporter                                    |
| 158        | Q02127               | Dihydroorotate dehydrogenase, mitochondrial                              |
| 159        | Q02153               | Guanylate cyclase soluble subunit beta-1                                 |
| 160        | Q05940               | Synaptic vesicular amine transporter                                     |
| 161        | Q07869               | Peroxisome proliferator-activated receptor alpha                         |

---

| <b>No.</b> | <b>Swiss-Prot AC</b> | <b>Protein Name</b>                                       |
|------------|----------------------|-----------------------------------------------------------|
| 162        | Q09428               | ATP-binding cassette transporter sub-family C member 8    |
| 163        | Q12809               | Potassium voltage-gated channel subfamily H member 2      |
| 164        | Q12879               | Glutamate [NMDA] receptor subunit epsilon-1               |
| 165        | Q13224               | Glutamate [NMDA] receptor subunit epsilon-2               |
| 166        | Q13621               | Solute carrier family 12 member 1                         |
| 167        | Q13639               | 5-hydroxytryptamine 4 receptor                            |
| 168        | Q13936               | Voltage-dependent L-type calcium channel subunit alpha-1C |
| 169        | Q14432               | cGMP-inhibited 3',5'-cyclic phosphodiesterase A           |
| 170        | Q14524               | Sodium channel protein type 5 subunit alpha               |
| 171        | Q14654               | ATP-sensitive inward rectifier potassium channel 11       |
| 172        | Q15413               | Ryanodine receptor 3                                      |
| 173        | Q15822               | Neuronal acetylcholine receptor subunit alpha-2           |
| 174        | Q16739               | Ceramide glucosyltransferase                              |
| 175        | Q16881               | Thioredoxin reductase 1, cytoplasmic                      |
| 176        | Q92731               | Estrogen receptor beta                                    |
| 177        | Q96RI1               | Bile acid receptor                                        |
| 178        | Q99720               | Sigma 1-type opioid receptor                              |
| 179        | Q99808               | Equilibrative nucleoside transporter 1                    |
| 180        | Q9BQB6               | Vitamin K epoxide reductase complex subunit 1             |
| 181        | Q9H244               | P2Y purinoceptor 12                                       |
| 182        | Q9H4B7               | Tubulin beta-1 chain                                      |
| 183        | Q9UBS5               | Gamma-aminobutyric acid type B receptor, subunit 1        |
| 184        | Q9UHC9               | Niemann-Pick C1-like protein 1                            |
| 185        | Q9UK17               | Potassium voltage-gated channel subfamily D member 3      |
| 186        | Q9Y271               | Cysteinyl leukotriene receptor 1                          |

---
